# Supplementary material for: Endothelial Nitric Oxide Synthase G894T Polymorphism Associates with Disease Severity in Puumala Hantavirus Infection
Source: PubMed Central journal article supplement (PMC4641644; doi:10.1371/journal.pone.0142872), 2015-11-11
Supplement: pone.0142872.s001.pdf [file pone.0142872.s001.pdf]

```

GET
FILE='C:\Users\mehehu\AppData\Local\Microsoft\Windows\Temporary Internet Files\Content.Outlook\ELK0KF
DATASET NAME DataSet1 WINDOW=FRONT.

SAVE OUTFILE='D:\mehehu\mehehu_datat_C\tutkimus\projektit\Outi_1\Outi_K\polymorfiat.sav'
/COMPRESSED.
FREQUENCIES VARIABLES=enosnum inosnum estrogenum
/ORDER=ANALYSIS.

```

1) Enos-, inos- ja estr1- genotyypin (variaabelitenosnum, inosnum ja estrogenum) ja enos-, inos- ja estr-kantajuuksien (carAinos, carGinos, carGenos, carTenos, carTestr ja carCestr) p-arvot/assosiaatiot vielä seuraaviin klinisiin muuttujiin: oloaika, sbpmax, sbpmin, dbpmin, dbpmax, dialyysi

```
[DataSet1] D:\mehehu\mehehu_datat_C\tutkimus\projektit\Outi_1\Outi_K\polymorfiat.sav
```

### Statistics

|   |         | enosnum | inosnum | estrogenireseptori<br>numeerisesti |
|---|---------|---------|---------|------------------------------------|
| N | Valid   | 172     | 172     | 172                                |
|   | Missing | 0       | 0       | 0                                  |

### Frequency Table

#### enosnum

|       |          | Frequency | Percent | Valid Percent | Cumulative<br>Percent |
|-------|----------|-----------|---------|---------------|-----------------------|
| Valid | G        | 98        | 57.0    | 57.0          | 57.0                  |
|       | Both     | 59        | 34.3    | 34.3          | 91.3                  |
|       | T        | 10        | 5.8     | 5.8           | 97.1                  |
|       | Undeterm | 5         | 2.9     | 2.9           | 100.0                 |
|       | Total    | 172       | 100.0   | 100.0         |                       |

#### inosnum

|       |          | Frequency | Percent | Valid Percent | Cumulative<br>Percent |
|-------|----------|-----------|---------|---------------|-----------------------|
| Valid | G        | 107       | 62.2    | 62.2          | 62.2                  |
|       | Both     | 55        | 32.0    | 32.0          | 94.2                  |
|       | A        | 4         | 2.3     | 2.3           | 96.5                  |
|       | Undeterm | 6         | 3.5     | 3.5           | 100.0                 |
|       | Total    | 172       | 100.0   | 100.0         |                       |

#### estrogenireseptori numeerisesti

|       |         | Frequency | Percent | Valid Percent | Cumulative<br>Percent |
|-------|---------|-----------|---------|---------------|-----------------------|
| Valid | T       | 52        | 30.2    | 30.2          | 30.2                  |
|       | Both    | 82        | 47.7    | 47.7          | 77.9                  |
|       | C       | 29        | 16.9    | 16.9          | 94.8                  |
|       | Undeter | 9         | 5.2     | 5.2           | 100.0                 |
|       | Total   | 172       | 100.0   | 100.0         |                       |

```

GET
FILE='D:\mehehu\mehehu_datat_C\tutkimus\projektit\Outi_1\Outi_K\polymorfiat2.sav'.
DATASET NAME DataSet2 WINDOW=FRONT.

```

DATASET ACTIVATE DataSet1.

FREQUENCIES VARIABLES=carAinos carGinos carGenos carTenos carTestr carCestr  
/ORDER=ANALYSIS.

## Frequencies

[DataSet1] D:\mehehu\mehehu\_datat\_C\tutkimus\projektit\Outi\_1\Outi\_K\polymorfiat.sav

### Statistics

|   |         | inos A-alleelin kantaja | inos G-alleelin kantaja | enos G-alleelin kantaja | enos T-alleelin kantaja | estr T-alleelin kantaja | estr C-alleelin kantaja |
|---|---------|-------------------------|-------------------------|-------------------------|-------------------------|-------------------------|-------------------------|
| N | Valid   | 166                     | 166                     | 167                     | 167                     | 163                     | 163                     |
|   | Missing | 6                       | 6                       | 5                       | 5                       | 9                       | 9                       |

## Frequency Table

### inos A-alleelin kantaja

|         |                      | Frequency | Percent | Valid Percent | Cumulative Percent |
|---------|----------------------|-----------|---------|---------------|--------------------|
| Valid   | ei kannaa A-alleelia | 107       | 62.2    | 64.5          | 64.5               |
|         | kantaa A-alleelia    | 59        | 34.3    | 35.5          | 100.0              |
|         | Total                | 166       | 96.5    | 100.0         |                    |
| Missing | System               | 6         | 3.5     |               |                    |
| Total   |                      | 172       | 100.0   |               |                    |

### inos G-alleelin kantaja

|         |                      | Frequency | Percent | Valid Percent | Cumulative Percent |
|---------|----------------------|-----------|---------|---------------|--------------------|
| Valid   | ei kannaa G-alleelia | 4         | 2.3     | 2.4           | 2.4                |
|         | kantaa G-alleelia    | 162       | 94.2    | 97.6          | 100.0              |
|         | Total                | 166       | 96.5    | 100.0         |                    |
| Missing | System               | 6         | 3.5     |               |                    |
| Total   |                      | 172       | 100.0   |               |                    |

### enos G-alleelin kantaja

|         |                      | Frequency | Percent | Valid Percent | Cumulative Percent |
|---------|----------------------|-----------|---------|---------------|--------------------|
| Valid   | ei kannaa G-alleelia | 10        | 5.8     | 6.0           | 6.0                |
|         | kantaa G-alleelia    | 157       | 91.3    | 94.0          | 100.0              |
|         | Total                | 167       | 97.1    | 100.0         |                    |
| Missing | System               | 5         | 2.9     |               |                    |
| Total   |                      | 172       | 100.0   |               |                    |

### enos T-alleelin kantaja

|         |                      | Frequency | Percent | Valid Percent | Cumulative Percent |
|---------|----------------------|-----------|---------|---------------|--------------------|
| Valid   | ei kannaa T-alleelia | 98        | 57.0    | 58.7          | 58.7               |
|         | kantaa T-alleelia    | 69        | 40.1    | 41.3          | 100.0              |
|         | Total                | 167       | 97.1    | 100.0         |                    |
| Missing | System               | 5         | 2.9     |               |                    |
| Total   |                      | 172       | 100.0   |               |                    |

### estr T-alleelin kantaja

|                           | Frequency | Percent | Valid Percent | Cumulative Percent |
|---------------------------|-----------|---------|---------------|--------------------|
| Valid ei kanna T-alleelia | 29        | 16.9    | 17.8          | 17.8               |
| kantaa T-alleelia         | 134       | 77.9    | 82.2          | 100.0              |
| Total                     | 163       | 94.8    | 100.0         |                    |
| Missing System            | 9         | 5.2     |               |                    |
| Total                     | 172       | 100.0   |               |                    |

### estr C-alleelin kantaja

|                               | Frequency | Percent | Valid Percent | Cumulative Percent |
|-------------------------------|-----------|---------|---------------|--------------------|
| Valid ei ole alleelin kantaja | 52        | 30.2    | 31.9          | 31.9               |
| alleelin kantaja              | 111       | 64.5    | 68.1          | 100.0              |
| Total                         | 163       | 94.8    | 100.0         |                    |
| Missing System                | 9         | 5.2     |               |                    |
| Total                         | 172       | 100.0   |               |                    |

```
DATASET ACTIVATE DataSet2.  
SORT CASES BY enosnum.  
SPLIT FILE LAYERED BY enosnum.
```

```
FREQUENCIES VARIABLES=oloaika sbpmax sbpmin dbpmin dbpmax  
/FORMAT=NOTABLE  
/NTILES=4  
/STATISTICS=STDDEV MINIMUM MAXIMUM MEAN MEDIAN  
/ORDER=ANALYSIS.
```

## Frequencies

```
[DataSet2] D:\mehehu\mehehu_datat_C\tutkimus\projektit\Outi_1\Outi_K\polymorfiat2.sav
```

### Statistics

| enosnum  |                |         | oloaika | sbpmax   | sbpmin   | dbpmin   | dbpmax   |
|----------|----------------|---------|---------|----------|----------|----------|----------|
| G        | N              | Valid   | 98      | 97       | 97       | 97       | 97       |
|          |                | Missing | 0       | 1        | 1        | 1        | 1        |
|          | Mean           |         | 6.3878  | 139.5670 | 113.5773 | 70.0722  | 86.9897  |
|          | Median         |         | 6.0000  | 135.0000 | 111.0000 | 70.0000  | 86.0000  |
|          | Std. Deviation |         | 2.30925 | 19.78210 | 15.47702 | 9.55603  | 10.69316 |
|          | Minimum        |         | 3.00    | 102.00   | 85.00    | 45.00    | 64.00    |
|          | Maximum        |         | 15.00   | 210.00   | 170.00   | 92.00    | 112.00   |
|          | Percentiles    | 25      | 5.0000  | 126.5000 | 104.0000 | 62.0000  | 80.0000  |
|          |                | 50      | 6.0000  | 135.0000 | 111.0000 | 70.0000  | 86.0000  |
|          |                | 75      | 8.0000  | 148.0000 | 121.5000 | 77.5000  | 94.5000  |
| Both     | N              | Valid   | 59      | 59       | 59       | 58       | 59       |
|          |                | Missing | 0       | 0        | 0        | 1        | 0        |
|          | Mean           |         | 6.4237  | 141.3729 | 115.8136 | 70.6379  | 89.2881  |
|          | Median         |         | 6.0000  | 141.0000 | 115.0000 | 70.0000  | 89.0000  |
|          | Std. Deviation |         | 2.67945 | 19.19581 | 16.96088 | 10.11287 | 12.81305 |
|          | Minimum        |         | 2.00    | 107.00   | 74.00    | 40.00    | 67.00    |
|          | Maximum        |         | 15.00   | 204.00   | 155.00   | 91.00    | 120.00   |
|          | Percentiles    | 25      | 5.0000  | 126.0000 | 106.0000 | 65.7500  | 80.0000  |
|          |                | 50      | 6.0000  | 141.0000 | 115.0000 | 70.0000  | 89.0000  |
|          |                | 75      | 8.0000  | 154.0000 | 126.0000 | 79.0000  | 98.0000  |
| T        | N              | Valid   | 10      | 10       | 10       | 10       | 10       |
|          |                | Missing | 0       | 0        | 0        | 0        | 0        |
|          | Mean           |         | 8.2000  | 148.8000 | 116.1000 | 67.2000  | 93.1000  |
|          | Median         |         | 8.0000  | 147.5000 | 111.0000 | 64.5000  | 93.0000  |
|          | Std. Deviation |         | 2.93636 | 28.78580 | 24.01134 | 13.77437 | 16.57609 |
|          | Minimum        |         | 3.00    | 95.00    | 86.00    | 48.00    | 60.00    |
|          | Maximum        |         | 14.00   | 192.00   | 162.00   | 100.00   | 110.00   |
|          | Percentiles    | 25      | 6.7500  | 132.0000 | 98.0000  | 60.0000  | 82.0000  |
|          |                | 50      | 8.0000  | 147.5000 | 111.0000 | 64.5000  | 93.0000  |
|          |                | 75      | 10.0000 | 169.7500 | 128.7500 | 71.7500  | 109.2500 |
| Undeterm | N              | Valid   | 5       | 5        | 5        | 5        | 5        |
|          |                | Missing | 0       | 0        | 0        | 0        | 0        |
|          | Mean           |         | 5.4000  | 125.2000 | 109.2000 | 65.6000  | 76.8000  |
|          | Median         |         | 4.0000  | 120.0000 | 110.0000 | 65.0000  | 72.0000  |
|          | Std. Deviation |         | 2.60768 | 18.45806 | 9.83362  | 6.87750  | 10.75639 |
|          | Minimum        |         | 4.00    | 106.00   | 94.00    | 58.00    | 69.00    |
|          | Maximum        |         | 10.00   | 154.00   | 120.00   | 74.00    | 95.00    |
|          | Percentiles    | 25      | 4.0000  | 110.5000 | 100.5000 | 59.0000  | 69.5000  |
|          |                | 50      | 4.0000  | 120.0000 | 110.0000 | 65.0000  | 72.0000  |
|          |                | 75      | 7.5000  | 142.5000 | 117.5000 | 72.5000  | 86.5000  |

SPLIT FILE OFF.

NPAR TESTS

/K-W=oloaika sbpmax sbpmin dbpmin dbpmax BY enosnum(1 3)

/MISSING ANALYSIS.

### NPar Tests

[DataSet2] D:\mehehu\mehehu\_datat\_C\tutkimus\projektit\Outi\_1\Outi\_K\polymorfiat2.sav

## Kruskal-Wallis Test

### Ranks

| enosnum |       | N   | Mean Rank |
|---------|-------|-----|-----------|
| oloaika | G     | 98  | 82.23     |
|         | Both  | 59  | 81.59     |
|         | T     | 10  | 115.55    |
|         | Total | 167 |           |
| sbpmax  | G     | 97  | 79.38     |
|         | Both  | 59  | 86.81     |
|         | T     | 10  | 104.00    |
|         | Total | 166 |           |
| sbpmin  | G     | 97  | 79.94     |
|         | Both  | 59  | 90.08     |
|         | T     | 10  | 79.15     |
|         | Total | 166 |           |
| dbpmin  | G     | 97  | 82.25     |
|         | Both  | 58  | 87.85     |
|         | T     | 10  | 62.15     |
|         | Total | 165 |           |
| dbpmax  | G     | 97  | 79.23     |
|         | Both  | 59  | 87.02     |
|         | T     | 10  | 104.15    |
|         | Total | 166 |           |

### Test Statistics<sup>a,b</sup>

|             | oloaika | sbpmax | sbpmin | dbpmin | dbpmax |
|-------------|---------|--------|--------|--------|--------|
| Chi-Square  | 4.614   | 2.814  | 1.722  | 2.533  | 2.930  |
| df          | 2       | 2      | 2      | 2      | 2      |
| Asymp. Sig. | .100    | .245   | .423   | .282   | .231   |

a. Kruskal Wallis Test

b. Grouping Variable: enosnum

\*\*\* inosnum \*\*\*.

SORT CASES BY inosnum.

SPLIT FILE LAYERED BY inosnum.

FREQUENCIES VARIABLES=oloaika sbpmax sbpmin dbpmin dbpmax

/FORMAT=NOTABLE

/NTILES=4

/STATISTICS=STDDEV MINIMUM MAXIMUM MEAN MEDIAN

/ORDER=ANALYSIS.

## Frequencies

[DataSet2] D:\mehehu\mehehu\_datat\_C\tutkimus\projektit\Outi\_1\Outi\_K\polymorfiat2.sav

**Statistics**

| inosnum  |                |         | oloaika | sbpmax   | sbpmin   | dbpmin   | dbpmax   |
|----------|----------------|---------|---------|----------|----------|----------|----------|
| G        | N              | Valid   | 107     | 106      | 106      | 106      | 106      |
|          |                | Missing | 0       | 1        | 1        | 1        | 1        |
|          | Mean           |         | 6.3738  | 142.6226 | 117.0377 | 72.0000  | 89.0755  |
|          | Median         |         | 6.0000  | 140.0000 | 115.5000 | 71.5000  | 89.0000  |
|          | Std. Deviation |         | 2.33724 | 20.65381 | 15.98864 | 9.14851  | 12.36331 |
|          | Minimum        |         | 2.00    | 95.00    | 86.00    | 48.00    | 60.00    |
|          | Maximum        |         | 14.00   | 210.00   | 162.00   | 100.00   | 120.00   |
|          | Percentiles    | 25      | 5.0000  | 130.0000 | 106.7500 | 66.0000  | 80.0000  |
|          |                | 50      | 6.0000  | 140.0000 | 115.5000 | 71.5000  | 89.0000  |
|          |                | 75      | 8.0000  | 156.2500 | 125.0000 | 78.2500  | 98.2500  |
| Both     | N              | Valid   | 55      | 55       | 55       | 54       | 55       |
|          |                | Missing | 0       | 0        | 0        | 1        | 0        |
|          | Mean           |         | 6.9091  | 138.5455 | 111.2182 | 66.7963  | 87.3273  |
|          | Median         |         | 7.0000  | 134.0000 | 110.0000 | 66.5000  | 87.0000  |
|          | Std. Deviation |         | 2.90129 | 19.47060 | 16.66855 | 10.46897 | 10.94101 |
|          | Minimum        |         | 3.00    | 111.00   | 74.00    | 40.00    | 64.00    |
|          | Maximum        |         | 15.00   | 198.00   | 170.00   | 90.00    | 109.00   |
|          | Percentiles    | 25      | 5.0000  | 125.0000 | 100.0000 | 60.0000  | 80.0000  |
|          |                | 50      | 7.0000  | 134.0000 | 110.0000 | 66.5000  | 87.0000  |
|          |                | 75      | 8.0000  | 147.0000 | 120.0000 | 74.0000  | 94.0000  |
| A        | N              | Valid   | 4       | 4        | 4        | 4        | 4        |
|          |                | Missing | 0       | 0        | 0        | 0        | 0        |
|          | Mean           |         | 5.0000  | 130.0000 | 111.5000 | 69.2500  | 77.5000  |
|          | Median         |         | 5.0000  | 131.0000 | 111.5000 | 71.0000  | 78.5000  |
|          | Std. Deviation |         | .81650  | 6.68331  | 2.38048  | 6.50000  | 7.59386  |
|          | Minimum        |         | 4.00    | 122.00   | 109.00   | 60.00    | 68.00    |
|          | Maximum        |         | 6.00    | 136.00   | 114.00   | 75.00    | 85.00    |
|          | Percentiles    | 25      | 4.2500  | 123.2500 | 109.2500 | 62.5000  | 69.7500  |
|          |                | 50      | 5.0000  | 131.0000 | 111.5000 | 71.0000  | 78.5000  |
|          |                | 75      | 5.7500  | 135.7500 | 113.7500 | 74.2500  | 84.2500  |
| Undeterm | N              | Valid   | 6       | 6        | 6        | 6        | 6        |
|          |                | Missing | 0       | 0        | 0        | 0        | 0        |
|          | Mean           |         | 5.3333  | 122.5000 | 98.0000  | 63.0000  | 77.6667  |
|          | Median         |         | 5.0000  | 126.0000 | 94.5000  | 62.5000  | 75.0000  |
|          | Std. Deviation |         | 1.50555 | 15.99687 | 12.64911 | 11.78134 | 10.98484 |
|          | Minimum        |         | 4.00    | 102.00   | 85.00    | 45.00    | 66.00    |
|          | Maximum        |         | 8.00    | 142.00   | 115.00   | 79.00    | 96.00    |
|          | Percentiles    | 25      | 4.0000  | 105.0000 | 86.5000  | 54.7500  | 69.0000  |
|          |                | 50      | 5.0000  | 126.0000 | 94.5000  | 62.5000  | 75.0000  |
|          |                | 75      | 6.5000  | 135.2500 | 112.7500 | 73.0000  | 87.0000  |

SPLIT FILE OFF.

NPAR TESTS

/K-W=oloaika sbpmax sbpmin dbpmin dbpmax BY inosnum(1 3)

/MISSING ANALYSIS.

**NPar Tests**

[DataSet2] D:\mehehu\mehehu\_datat\_C\tutkimus\projektit\Outi\_1\Outi\_K\polymorfiat2.sav

## Kruskal-Wallis Test

### Ranks

|         | inosnum | N   | Mean Rank |
|---------|---------|-----|-----------|
| oloaika | G       | 107 | 82.10     |
|         | Both    | 55  | 88.50     |
|         | A       | 4   | 52.25     |
|         | Total   | 166 |           |
| sbpmax  | G       | 106 | 88.21     |
|         | Both    | 55  | 75.03     |
|         | A       | 4   | 54.63     |
|         | Total   | 165 |           |
| sbpmin  | G       | 106 | 89.52     |
|         | Both    | 55  | 71.25     |
|         | A       | 4   | 71.75     |
|         | Total   | 165 |           |
| dbpmin  | G       | 106 | 90.60     |
|         | Both    | 54  | 66.90     |
|         | A       | 4   | 78.38     |
|         | Total   | 164 |           |
| dbpmax  | G       | 106 | 85.78     |
|         | Both    | 55  | 80.80     |
|         | A       | 4   | 39.50     |
|         | Total   | 165 |           |

### Test Statistics<sup>a,b</sup>

|             | oloaika | sbpmax | sbpmin | dbpmin | dbpmax |
|-------------|---------|--------|--------|--------|--------|
| Chi-Square  | 2.417   | 4.205  | 5.534  | 8.969  | 3.797  |
| df          | 2       | 2      | 2      | 2      | 2      |
| Asymp. Sig. | .299    | .122   | .063   | .011   | .150   |

a. Kruskal Wallis Test

b. Grouping Variable: inosnum

\*\*\* estrognum \*\*\*.

SORT CASES BY estrognum.

SPLIT FILE LAYERED BY estrognum.

FREQUENCIES VARIABLES=oloaika sbpmax sbpmin dbpmin dbpmax

/FORMAT=NOTABLE

/NTILES=4

/STATISTICS=STDDEV MINIMUM MAXIMUM MEAN MEDIAN

/ORDER=ANALYSIS.

## Frequencies

[DataSet2] D:\mehehu\mehehu\_datat\_C\tutkimus\projektit\Outi\_1\Outi\_K\polymorfiat2.sav

### Statistics

| estrogenireseptori numeerisesti |                |         | oloaika | sbpmax   | sbpmin   | dbpmin   | dbpmax   |
|---------------------------------|----------------|---------|---------|----------|----------|----------|----------|
| T                               | N              | Valid   | 52      | 51       | 51       | 50       | 51       |
|                                 |                | Missing | 0       | 1        | 1        | 2        | 1        |
|                                 | Mean           |         | 6.5000  | 139.8431 | 113.4902 | 71.1800  | 87.3529  |
|                                 | Median         |         | 6.0000  | 136.0000 | 112.0000 | 72.0000  | 88.0000  |
|                                 | Std. Deviation |         | 2.85945 | 18.86730 | 14.87733 | 8.40236  | 11.15854 |
|                                 | Minimum        |         | 2.00    | 107.00   | 86.00    | 54.00    | 67.00    |
|                                 | Maximum        |         | 15.00   | 188.00   | 149.00   | 90.00    | 113.00   |
|                                 | Percentiles    | 25      | 4.2500  | 125.0000 | 104.0000 | 64.2500  | 78.0000  |
|                                 |                | 50      | 6.0000  | 136.0000 | 112.0000 | 72.0000  | 88.0000  |
|                                 |                | 75      | 8.0000  | 148.0000 | 120.0000 | 79.0000  | 96.0000  |
| Both                            | N              | Valid   | 82      | 82       | 82       | 82       | 82       |
|                                 |                | Missing | 0       | 0        | 0        | 0        | 0        |
|                                 | Mean           |         | 6.6829  | 140.4146 | 115.1098 | 70.2317  | 88.2317  |
|                                 | Median         |         | 6.0000  | 137.5000 | 113.0000 | 70.0000  | 88.0000  |
|                                 | Std. Deviation |         | 2.47395 | 19.88234 | 15.73861 | 9.86989  | 12.17090 |
|                                 | Minimum        |         | 3.00    | 95.00    | 82.00    | 40.00    | 60.00    |
|                                 | Maximum        |         | 15.00   | 210.00   | 162.00   | 100.00   | 112.00   |
|                                 | Percentiles    | 25      | 5.0000  | 127.2500 | 105.0000 | 64.0000  | 80.0000  |
|                                 |                | 50      | 6.0000  | 137.5000 | 113.0000 | 70.0000  | 88.0000  |
|                                 |                | 75      | 9.0000  | 150.7500 | 124.0000 | 78.0000  | 95.2500  |
| C                               | N              | Valid   | 29      | 29       | 29       | 29       | 29       |
|                                 |                | Missing | 0       | 0        | 0        | 0        | 0        |
|                                 | Mean           |         | 6.2414  | 143.1379 | 113.3103 | 66.7931  | 89.7241  |
|                                 | Median         |         | 7.0000  | 139.0000 | 113.0000 | 68.0000  | 88.0000  |
|                                 | Std. Deviation |         | 2.06424 | 23.58075 | 20.46793 | 11.99815 | 12.85606 |
|                                 | Minimum        |         | 2.00    | 102.00   | 74.00    | 40.00    | 66.00    |
|                                 | Maximum        |         | 10.00   | 204.00   | 170.00   | 91.00    | 120.00   |
|                                 | Percentiles    | 25      | 4.0000  | 129.0000 | 99.5000  | 60.0000  | 83.0000  |
|                                 |                | 50      | 7.0000  | 139.0000 | 113.0000 | 68.0000  | 88.0000  |
|                                 |                | 75      | 7.0000  | 156.0000 | 124.5000 | 73.0000  | 100.0000 |
| Undeter                         | N              | Valid   | 9       | 9        | 9        | 9        | 9        |
|                                 |                | Missing | 0       | 0        | 0        | 0        | 0        |
|                                 | Mean           |         | 5.2222  | 132.8889 | 116.0000 | 71.0000  | 81.0000  |
|                                 | Median         |         | 5.0000  | 130.0000 | 115.0000 | 71.0000  | 78.0000  |
|                                 | Std. Deviation |         | 1.71594 | 21.25702 | 18.03469 | 10.78193 | 11.80042 |
|                                 | Minimum        |         | 3.00    | 106.00   | 94.00    | 58.00    | 65.00    |
|                                 | Maximum        |         | 8.00    | 173.00   | 157.00   | 92.00    | 105.00   |
|                                 | Percentiles    | 25      | 3.5000  | 118.5000 | 103.5000 | 62.0000  | 72.5000  |
|                                 |                | 50      | 5.0000  | 130.0000 | 115.0000 | 71.0000  | 78.0000  |
|                                 |                | 75      | 6.5000  | 147.0000 | 119.5000 | 77.5000  | 88.0000  |

SPLIT FILE OFF.

NPAR TESTS

/K-W=oloaika sbpmax sbpmin dbpmin dbpmax BY estrogenum(1 3)

/MISSING ANALYSIS.

### NPar Tests

[DataSet2] D:\mehehu\mehehu\_datat\_C\tutkimus\projektit\Outi\_1\Outi\_K\polymorfiat2.sav



## Kruskal-Wallis Test

### Ranks

| estrogenireseptori<br>numeerisesti |       | N   | Mean Rank |
|------------------------------------|-------|-----|-----------|
| oloaika                            | T     | 52  | 79.78     |
|                                    | Both  | 82  | 84.30     |
|                                    | C     | 29  | 79.48     |
|                                    | Total | 163 |           |
| sbpmax                             | T     | 51  | 80.03     |
|                                    | Both  | 82  | 81.20     |
|                                    | C     | 29  | 84.95     |
|                                    | Total | 162 |           |
| sbpmin                             | T     | 51  | 79.94     |
|                                    | Both  | 82  | 83.51     |
|                                    | C     | 29  | 78.55     |
|                                    | Total | 162 |           |
| dbpmin                             | T     | 50  | 87.74     |
|                                    | Both  | 82  | 81.99     |
|                                    | C     | 29  | 66.57     |
|                                    | Total | 161 |           |
| dbpmax                             | T     | 51  | 77.93     |
|                                    | Both  | 82  | 81.76     |
|                                    | C     | 29  | 87.05     |
|                                    | Total | 162 |           |

### Test Statistics<sup>a,b</sup>

|             | oloaika | sbpmax | sbpmin | dbpmin | dbpmax |
|-------------|---------|--------|--------|--------|--------|
| Chi-Square  | .399    | .210   | .322   | 3.871  | .705   |
| df          | 2       | 2      | 2      | 2      | 2      |
| Asymp. Sig. | .819    | .900   | .851   | .144   | .703   |

a. Kruskal Wallis Test

b. Grouping Variable: estrogenireseptori numeerisesti

```

DATASET ACTIVATE DataSet1.
***** carAinos.***.
SORT CASES BY carAinos.
SPLIT FILE LAYERED BY carAinos.

```

```

FREQUENCIES VARIABLES=oloaika sbpmax sbpmin dbpmin dbpmax
/FORMAT=NOTABLE
/NTILES=4
/STATISTICS=STDDEV MINIMUM MAXIMUM MEAN MEDIAN
/ORDER=ANALYSIS.

```

## Frequencies

[DataSet1] D:\mehehu\mehehu\_datat\_C\tutkimus\projektit\Outi\_1\Outi\_K\polymorfiat.sav

### Statistics

| inos A-alleelin kantaaja |    |         | oloaika | sbpmax   | sbpmin   | dbpmin   | dbpmax   |
|--------------------------|----|---------|---------|----------|----------|----------|----------|
| .00                      | N  | Valid   | 6       | 6        | 6        | 6        | 6        |
|                          |    | Missing | 0       | 0        | 0        | 0        | 0        |
| Mean                     |    |         | 5.3333  | 122.5000 | 98.0000  | 63.0000  | 77.6667  |
| Median                   |    |         | 5.0000  | 126.0000 | 94.5000  | 62.5000  | 75.0000  |
| Std. Deviation           |    |         | 1.50555 | 15.99687 | 12.64911 | 11.78134 | 10.98484 |
| Minimum                  |    |         | 4.00    | 102.00   | 85.00    | 45.00    | 66.00    |
| Maximum                  |    |         | 8.00    | 142.00   | 115.00   | 79.00    | 96.00    |
| Percentiles              | 25 |         | 4.0000  | 105.0000 | 86.5000  | 54.7500  | 69.0000  |
|                          |    | 50      | 5.0000  | 126.0000 | 94.5000  | 62.5000  | 75.0000  |
|                          |    | 75      | 6.5000  | 135.2500 | 112.7500 | 73.0000  | 87.0000  |
| ei kanna A-alleelia      |    |         |         |          |          |          |          |
| N                        |    | Valid   | 107     | 106      | 106      | 106      | 106      |
|                          |    | Missing | 0       | 1        | 1        | 1        | 1        |
| Mean                     |    |         | 6.3738  | 142.6226 | 117.0377 | 72.0000  | 89.0755  |
| Median                   |    |         | 6.0000  | 140.0000 | 115.5000 | 71.5000  | 89.0000  |
| Std. Deviation           |    |         | 2.33724 | 20.65381 | 15.98864 | 9.14851  | 12.36331 |
| Minimum                  |    |         | 2.00    | 95.00    | 86.00    | 48.00    | 60.00    |
| Maximum                  |    |         | 14.00   | 210.00   | 162.00   | 100.00   | 120.00   |
| Percentiles              | 25 |         | 5.0000  | 130.0000 | 106.7500 | 66.0000  | 80.0000  |
|                          |    | 50      | 6.0000  | 140.0000 | 115.5000 | 71.5000  | 89.0000  |
|                          |    | 75      | 8.0000  | 156.2500 | 125.0000 | 78.2500  | 98.2500  |
| kanta A-alleelia         |    |         |         |          |          |          |          |
| N                        |    | Valid   | 59      | 59       | 59       | 58       | 59       |
|                          |    | Missing | 0       | 0        | 0        | 1        | 0        |
| Mean                     |    |         | 6.7797  | 137.9661 | 111.2373 | 66.9655  | 86.6610  |
| Median                   |    |         | 6.0000  | 134.0000 | 110.0000 | 68.0000  | 86.0000  |
| Std. Deviation           |    |         | 2.84707 | 18.97273 | 16.09277 | 10.22375 | 10.98370 |
| Minimum                  |    |         | 3.00    | 111.00   | 74.00    | 40.00    | 64.00    |
| Maximum                  |    |         | 15.00   | 198.00   | 170.00   | 90.00    | 109.00   |
| Percentiles              | 25 |         | 5.0000  | 125.0000 | 102.0000 | 60.0000  | 80.0000  |
|                          |    | 50      | 6.0000  | 134.0000 | 110.0000 | 68.0000  | 86.0000  |
|                          |    | 75      | 8.0000  | 143.0000 | 119.0000 | 74.0000  | 94.0000  |

SPLIT FILE OFF.

NPAR TESTS

/M-W= oloaika sbpmax sbpmin dbpmin dbpmax BY carAinos(0 1)

/MISSING ANALYSIS.

## NPar Tests

[DataSet1] D:\mehehu\mehehu\_datat\_C\tutkimus\projektit\Outi\_1\Outi\_K\polymorfia.sav

## Mann-Whitney Test

### Ranks

| inos A-alleelin kantaja |                     | N   | Mean Rank | Sum of Ranks |
|-------------------------|---------------------|-----|-----------|--------------|
| oloaika                 | ei kanna A-alleelia | 107 | 82.10     | 8784.50      |
|                         | kantaa A-alleelia   | 59  | 86.04     | 5076.50      |
|                         | Total               | 166 |           |              |
| sbpmax                  | ei kanna A-alleelia | 106 | 88.21     | 9350.00      |
|                         | kantaa A-alleelia   | 59  | 73.64     | 4345.00      |
|                         | Total               | 165 |           |              |
| sbpmin                  | ei kanna A-alleelia | 106 | 89.52     | 9489.50      |
|                         | kantaa A-alleelia   | 59  | 71.28     | 4205.50      |
|                         | Total               | 165 |           |              |
| dbpmin                  | ei kanna A-alleelia | 106 | 90.60     | 9604.00      |
|                         | kantaa A-alleelia   | 58  | 67.69     | 3926.00      |
|                         | Total               | 164 |           |              |
| dbpmax                  | ei kanna A-alleelia | 106 | 85.78     | 9093.00      |
|                         | kantaa A-alleelia   | 59  | 78.00     | 4602.00      |
|                         | Total               | 165 |           |              |

### Test Statistics<sup>a</sup>

|                        | oloaika  | sbpmax   | sbpmin   | dbpmin   | dbpmax   |
|------------------------|----------|----------|----------|----------|----------|
| Mann-Whitney U         | 3006.500 | 2575.000 | 2435.500 | 2215.000 | 2832.000 |
| Wilcoxon W             | 8784.500 | 4345.000 | 4205.500 | 3926.000 | 4602.000 |
| Z                      | -.510    | -1.877   | -2.352   | -2.958   | -1.004   |
| Asymp. Sig. (2-tailed) | .610     | .060     | .019     | .003     | .316     |

a. Grouping Variable: inos A-alleelin kantaja

\*\*\*\*\* carGinos.\*\*\*.

SORT CASES BY carGinos.

SPLIT FILE LAYERED BY carGinos.

FREQUENCIES VARIABLES=oloaika sbpmax sbpmin dbpmin dbpmax

/FORMAT=NOTABLE

/NTILES=4

/STATISTICS=STDDEV MINIMUM MAXIMUM MEAN MEDIAN

/ORDER=ANALYSIS.

## Frequencies

[DataSet1] D:\mehehu\mehehu\_datat\_C\tutkimus\projektit\Outi\_1\Outi\_K\polymorfia.sav

### Statistics

| inos G-alleelin kantaja |    |         | oloaika | sbpmax   | sbpmin   | dbpmin   | dbpmax   |
|-------------------------|----|---------|---------|----------|----------|----------|----------|
| .00                     | N  | Valid   | 6       | 6        | 6        | 6        | 6        |
|                         |    | Missing | 0       | 0        | 0        | 0        | 0        |
| Mean                    |    |         | 5.3333  | 122.5000 | 98.0000  | 63.0000  | 77.6667  |
| Median                  |    |         | 5.0000  | 126.0000 | 94.5000  | 62.5000  | 75.0000  |
| Std. Deviation          |    |         | 1.50555 | 15.99687 | 12.64911 | 11.78134 | 10.98484 |
| Minimum                 |    |         | 4.00    | 102.00   | 85.00    | 45.00    | 66.00    |
| Maximum                 |    |         | 8.00    | 142.00   | 115.00   | 79.00    | 96.00    |
| Percentiles             | 25 |         | 4.0000  | 105.0000 | 86.5000  | 54.7500  | 69.0000  |
|                         |    | 50      | 5.0000  | 126.0000 | 94.5000  | 62.5000  | 75.0000  |
|                         |    | 75      | 6.5000  | 135.2500 | 112.7500 | 73.0000  | 87.0000  |
| ei kann G alleelia      | N  | Valid   | 4       | 4        | 4        | 4        | 4        |
|                         |    | Missing | 0       | 0        | 0        | 0        | 0        |
| Mean                    |    |         | 5.0000  | 130.0000 | 111.5000 | 69.2500  | 77.5000  |
| Median                  |    |         | 5.0000  | 131.0000 | 111.5000 | 71.0000  | 78.5000  |
| Std. Deviation          |    |         | .81650  | 6.68331  | 2.38048  | 6.50000  | 7.59386  |
| Minimum                 |    |         | 4.00    | 122.00   | 109.00   | 60.00    | 68.00    |
| Maximum                 |    |         | 6.00    | 136.00   | 114.00   | 75.00    | 85.00    |
| Percentiles             | 25 |         | 4.2500  | 123.2500 | 109.2500 | 62.5000  | 69.7500  |
|                         |    | 50      | 5.0000  | 131.0000 | 111.5000 | 71.0000  | 78.5000  |
|                         |    | 75      | 5.7500  | 135.7500 | 113.7500 | 74.2500  | 84.2500  |
| kantaa G-alleelia       | N  | Valid   | 162     | 161      | 161      | 160      | 161      |
|                         |    | Missing | 0       | 1        | 1        | 2        | 1        |
| Mean                    |    |         | 6.5556  | 141.2298 | 115.0497 | 70.2438  | 88.4783  |
| Median                  |    |         | 6.0000  | 139.0000 | 114.0000 | 70.0000  | 88.0000  |
| Std. Deviation          |    |         | 2.54646 | 20.28924 | 16.40724 | 9.89425  | 11.89122 |
| Minimum                 |    |         | 2.00    | 95.00    | 74.00    | 40.00    | 60.00    |
| Maximum                 |    |         | 15.00   | 210.00   | 170.00   | 100.00   | 120.00   |
| Percentiles             | 25 |         | 5.0000  | 126.0000 | 104.5000 | 62.2500  | 80.0000  |
|                         |    | 50      | 6.0000  | 139.0000 | 114.0000 | 70.0000  | 88.0000  |
|                         |    | 75      | 8.0000  | 154.0000 | 124.0000 | 77.7500  | 96.0000  |

SPLIT FILE OFF.

NPAR TESTS

/M-W= oloaika sbpmax sbpmin dbpmin dbpmax BY carGinos(0 1)

/MISSING ANALYSIS.

## NPar Tests

[DataSet1] D:\mehehu\mehehu\_datat\_C\tutkimus\projektit\Outi\_1\Outi\_K\polymorfia.sav

## Mann-Whitney Test

### Ranks

| inos G-alleelin kantaja |                     | N   | Mean Rank | Sum of Ranks |
|-------------------------|---------------------|-----|-----------|--------------|
| oloaika                 | ei kanna G alleelia | 4   | 52.25     | 209.00       |
|                         | kantaa G-alleelia   | 162 | 84.27     | 13652.00     |
|                         | Total               | 166 |           |              |
| sbpmax                  | ei kanna G alleelia | 4   | 54.63     | 218.50       |
|                         | kantaa G-alleelia   | 161 | 83.70     | 13476.50     |
|                         | Total               | 165 |           |              |
| sbpmin                  | ei kanna G alleelia | 4   | 71.75     | 287.00       |
|                         | kantaa G-alleelia   | 161 | 83.28     | 13408.00     |
|                         | Total               | 165 |           |              |
| dbpmin                  | ei kanna G alleelia | 4   | 78.38     | 313.50       |
|                         | kantaa G-alleelia   | 160 | 82.60     | 13216.50     |
|                         | Total               | 164 |           |              |
| dbpmax                  | ei kanna G alleelia | 4   | 39.50     | 158.00       |
|                         | kantaa G-alleelia   | 161 | 84.08     | 13537.00     |
|                         | Total               | 165 |           |              |

### Test Statistics<sup>a</sup>

|                        | oloaika | sbpmax  | sbpmin  | dbpmin  | dbpmax  |
|------------------------|---------|---------|---------|---------|---------|
| Mann-Whitney U         | 199.000 | 208.500 | 277.000 | 303.500 | 148.000 |
| Wilcoxon W             | 209.000 | 218.500 | 287.000 | 313.500 | 158.000 |
| Z                      | -1.327  | -1.203  | -.477   | -.176   | -1.845  |
| Asymp. Sig. (2-tailed) | .184    | .229    | .633    | .860    | .065    |

a. Grouping Variable: inos G-alleelin kantaja

\*\*\*\*\* carGenos.\*\*\*.

SORT CASES BY carGenos.

SPLIT FILE LAYERED BY carGenos.

FREQUENCIES VARIABLES=oloaika sbpmax sbpmin dbpmin dbpmax

/FORMAT=NOTABLE

/NTILES=4

/STATISTICS=STDDEV MINIMUM MAXIMUM MEAN MEDIAN

/ORDER=ANALYSIS.

## Frequencies

[DataSet1] D:\mehehu\mehehu\_datat\_C\tutkimus\projektit\Outi\_l\Outi\_K\polymorfiat.sav

### Statistics

| enos G-alleelin kantaaja |   |         | oloaika | sbpmax   | sbpmin   | dbpmin   | dbpmax   |
|--------------------------|---|---------|---------|----------|----------|----------|----------|
| .00                      | N | Valid   | 5       | 5        | 5        | 5        | 5        |
|                          |   | Missing | 0       | 0        | 0        | 0        | 0        |
| Mean                     |   |         | 5.4000  | 125.2000 | 109.2000 | 65.6000  | 76.8000  |
| Median                   |   |         | 4.0000  | 120.0000 | 110.0000 | 65.0000  | 72.0000  |
| Std. Deviation           |   |         | 2.60768 | 18.45806 | 9.83362  | 6.87750  | 10.75639 |
| Minimum                  |   |         | 4.00    | 106.00   | 94.00    | 58.00    | 69.00    |
| Maximum                  |   |         | 10.00   | 154.00   | 120.00   | 74.00    | 95.00    |
| Percentiles              |   |         |         |          |          |          |          |
| 25                       |   |         | 4.0000  | 110.5000 | 100.5000 | 59.0000  | 69.5000  |
| 50                       |   |         | 4.0000  | 120.0000 | 110.0000 | 65.0000  | 72.0000  |
| 75                       |   |         | 7.5000  | 142.5000 | 117.5000 | 72.5000  | 86.5000  |
| ei kanna G-alleelia      |   |         |         |          |          |          |          |
|                          | N | Valid   | 10      | 10       | 10       | 10       | 10       |
|                          |   | Missing | 0       | 0        | 0        | 0        | 0        |
| Mean                     |   |         | 8.2000  | 148.8000 | 116.1000 | 67.2000  | 93.1000  |
| Median                   |   |         | 8.0000  | 147.5000 | 111.0000 | 64.5000  | 93.0000  |
| Std. Deviation           |   |         | 2.93636 | 28.78580 | 24.01134 | 13.77437 | 16.57609 |
| Minimum                  |   |         | 3.00    | 95.00    | 86.00    | 48.00    | 60.00    |
| Maximum                  |   |         | 14.00   | 192.00   | 162.00   | 100.00   | 110.00   |
| Percentiles              |   |         |         |          |          |          |          |
| 25                       |   |         | 6.7500  | 132.0000 | 98.0000  | 60.0000  | 82.0000  |
| 50                       |   |         | 8.0000  | 147.5000 | 111.0000 | 64.5000  | 93.0000  |
| 75                       |   |         | 10.0000 | 169.7500 | 128.7500 | 71.7500  | 109.2500 |
| kattaa G-alleelia        |   |         |         |          |          |          |          |
|                          | N | Valid   | 157     | 156      | 156      | 155      | 156      |
|                          |   | Missing | 0       | 1        | 1        | 2        | 1        |
| Mean                     |   |         | 6.4013  | 140.2500 | 114.4231 | 70.2839  | 87.8590  |
| Median                   |   |         | 6.0000  | 137.0000 | 113.5000 | 70.0000  | 87.5000  |
| Std. Deviation           |   |         | 2.44650 | 19.51992 | 16.03707 | 9.73930  | 11.55433 |
| Minimum                  |   |         | 2.00    | 102.00   | 74.00    | 40.00    | 64.00    |
| Maximum                  |   |         | 15.00   | 210.00   | 170.00   | 92.00    | 120.00   |
| Percentiles              |   |         |         |          |          |          |          |
| 25                       |   |         | 5.0000  | 126.0000 | 104.0000 | 63.0000  | 80.0000  |
| 50                       |   |         | 6.0000  | 137.0000 | 113.5000 | 70.0000  | 87.5000  |
| 75                       |   |         | 8.0000  | 150.0000 | 123.7500 | 78.0000  | 95.7500  |

SPLIT FILE OFF.

NPAR TESTS

/M-W= oloaika sbpmax sbpmin dbpmin dbpmax BY carGenos(0 1)

/MISSING ANALYSIS.

## NPar Tests

[DataSet1] D:\mehehu\mehehu\_datat\_C\tutkimus\projektit\Outi\_l\Outi\_K\polymorfia.sav

## Mann-Whitney Test

### Ranks

| enos G-alleelin kantaja |                     | N   | Mean Rank | Sum of Ranks |
|-------------------------|---------------------|-----|-----------|--------------|
| oloaika                 | ei kanna G-alleelia | 10  | 115.55    | 1155.50      |
|                         | kantaa G-alleelia   | 157 | 81.99     | 12872.50     |
|                         | Total               | 167 |           |              |
| sbpmax                  | ei kanna G-alleelia | 10  | 104.00    | 1040.00      |
|                         | kantaa G-alleelia   | 156 | 82.19     | 12821.00     |
|                         | Total               | 166 |           |              |
| sbpmin                  | ei kanna G-alleelia | 10  | 79.15     | 791.50       |
|                         | kantaa G-alleelia   | 156 | 83.78     | 13069.50     |
|                         | Total               | 166 |           |              |
| dbpmin                  | ei kanna G-alleelia | 10  | 62.15     | 621.50       |
|                         | kantaa G-alleelia   | 155 | 84.35     | 13073.50     |
|                         | Total               | 165 |           |              |
| dbpmax                  | ei kanna G-alleelia | 10  | 104.15    | 1041.50      |
|                         | kantaa G-alleelia   | 156 | 82.18     | 12819.50     |
|                         | Total               | 166 |           |              |

### Test Statistics<sup>a</sup>

|                        | oloaika   | sbpmax    | sbpmin  | dbpmin  | dbpmax    |
|------------------------|-----------|-----------|---------|---------|-----------|
| Mann-Whitney U         | 469.500   | 575.000   | 736.500 | 566.500 | 573.500   |
| Wilcoxon W             | 12872.500 | 12821.000 | 791.500 | 621.500 | 12819.500 |
| Z                      | -2.146    | -1.392    | -.295   | -1.426  | -1.402    |
| Asymp. Sig. (2-tailed) | .032      | .164      | .768    | .154    | .161      |

a. Grouping Variable: enos G-alleelin kantaja

\*\*\*\*\* carTenos.\*\*\*.

SORT CASES BY carTenos.

SPLIT FILE LAYERED BY carTenos.

FREQUENCIES VARIABLES=oloaika sbpmax sbpmin dbpmin dbpmax

/FORMAT=NOTABLE

/NTILES=4

/STATISTICS=STDDEV MINIMUM MAXIMUM MEAN MEDIAN

/ORDER=ANALYSIS.

## Frequencies

[DataSet1] D:\mehehu\mehehu\_datat\_C\tutkimus\projektit\Outi\_1\Outi\_K\polymorfiat.sav

### Statistics

| enos T-alleelin kantaja |    |         | oloaika | sbpmax   | sbpmin   | dbpmin   | dbpmax   |
|-------------------------|----|---------|---------|----------|----------|----------|----------|
| .00                     | N  | Valid   | 5       | 5        | 5        | 5        | 5        |
|                         |    | Missing | 0       | 0        | 0        | 0        | 0        |
| Mean                    |    |         | 5.4000  | 125.2000 | 109.2000 | 65.6000  | 76.8000  |
| Median                  |    |         | 4.0000  | 120.0000 | 110.0000 | 65.0000  | 72.0000  |
| Std. Deviation          |    |         | 2.60768 | 18.45806 | 9.83362  | 6.87750  | 10.75639 |
| Minimum                 |    |         | 4.00    | 106.00   | 94.00    | 58.00    | 69.00    |
| Maximum                 |    |         | 10.00   | 154.00   | 120.00   | 74.00    | 95.00    |
| Percentiles             | 25 |         | 4.0000  | 110.5000 | 100.5000 | 59.0000  | 69.5000  |
|                         |    | 50      | 4.0000  | 120.0000 | 110.0000 | 65.0000  | 72.0000  |
|                         |    | 75      | 7.5000  | 142.5000 | 117.5000 | 72.5000  | 86.5000  |
| ei kann T-alleelia      | N  | Valid   | 98      | 97       | 97       | 97       | 97       |
|                         |    | Missing | 0       | 1        | 1        | 1        | 1        |
| Mean                    |    |         | 6.3878  | 139.5670 | 113.5773 | 70.0722  | 86.9897  |
| Median                  |    |         | 6.0000  | 135.0000 | 111.0000 | 70.0000  | 86.0000  |
| Std. Deviation          |    |         | 2.30925 | 19.78210 | 15.47702 | 9.55603  | 10.69316 |
| Minimum                 |    |         | 3.00    | 102.00   | 85.00    | 45.00    | 64.00    |
| Maximum                 |    |         | 15.00   | 210.00   | 170.00   | 92.00    | 112.00   |
| Percentiles             | 25 |         | 5.0000  | 126.5000 | 104.0000 | 62.0000  | 80.0000  |
|                         |    | 50      | 6.0000  | 135.0000 | 111.0000 | 70.0000  | 86.0000  |
|                         |    | 75      | 8.0000  | 148.0000 | 121.5000 | 77.5000  | 94.5000  |
| kattaa T-alleelia       | N  | Valid   | 69      | 69       | 69       | 68       | 69       |
|                         |    | Missing | 0       | 0        | 0        | 1        | 0        |
| Mean                    |    |         | 6.6812  | 142.4493 | 115.8551 | 70.1324  | 89.8406  |
| Median                  |    |         | 6.0000  | 142.0000 | 115.0000 | 70.0000  | 90.0000  |
| Std. Deviation          |    |         | 2.76795 | 20.75809 | 17.93557 | 10.67694 | 13.35006 |
| Minimum                 |    |         | 2.00    | 95.00    | 74.00    | 40.00    | 60.00    |
| Maximum                 |    |         | 15.00   | 204.00   | 162.00   | 100.00   | 120.00   |
| Percentiles             | 25 |         | 5.0000  | 126.0000 | 105.0000 | 62.7500  | 80.0000  |
|                         |    | 50      | 6.0000  | 142.0000 | 115.0000 | 70.0000  | 90.0000  |
|                         |    | 75      | 8.5000  | 155.5000 | 125.0000 | 77.7500  | 100.0000 |

SPLIT FILE OFF.

NPAR TESTS

/M-W= oloaika sbpmax sbpmin dbpmin dbpmax BY carTenos(0 1)

/MISSING ANALYSIS.

## NPar Tests

[DataSet1] D:\mehehu\mehehu\_datat\_C\tutkimus\projektit\Outi\_1\Outi\_K\polymorfia.sav

## Mann-Whitney Test



### Ranks

| enos T-alleelin kantaja |                      | N   | Mean Rank | Sum of Ranks |
|-------------------------|----------------------|-----|-----------|--------------|
| oloaika                 | ei kannaa T-alleelia | 98  | 82.23     | 8058.50      |
|                         | kantaa T-alleelia    | 69  | 86.51     | 5969.50      |
|                         | Total                | 167 |           |              |
| sbpmax                  | ei kannaa T-alleelia | 97  | 79.38     | 7699.50      |
|                         | kantaa T-alleelia    | 69  | 89.30     | 6161.50      |
|                         | Total                | 166 |           |              |
| sbpmin                  | ei kannaa T-alleelia | 97  | 79.94     | 7754.50      |
|                         | kantaa T-alleelia    | 69  | 88.50     | 6106.50      |
|                         | Total                | 166 |           |              |
| dbpmin                  | ei kannaa T-alleelia | 97  | 82.25     | 7978.00      |
|                         | kantaa T-alleelia    | 68  | 84.07     | 5717.00      |
|                         | Total                | 165 |           |              |
| dbpmax                  | ei kannaa T-alleelia | 97  | 79.23     | 7685.50      |
|                         | kantaa T-alleelia    | 69  | 89.50     | 6175.50      |
|                         | Total                | 166 |           |              |

### Test Statistics<sup>a</sup>

|                        | oloaika  | sbpmax   | sbpmin   | dbpmin   | dbpmax   |
|------------------------|----------|----------|----------|----------|----------|
| Mann-Whitney U         | 3207.500 | 2946.500 | 3001.500 | 3225.000 | 2932.500 |
| Wilcoxon W             | 8058.500 | 7699.500 | 7754.500 | 7978.000 | 7685.500 |
| Z                      | -.569    | -1.311   | -1.131   | -.242    | -1.357   |
| Asymp. Sig. (2-tailed) | .570     | .190     | .258     | .809     | .175     |

a. Grouping Variable: enos T-alleelin kantaja

\*\*\*\*\* carTestr\*\*\*.

SORT CASES BY carTestr.

SPLIT FILE LAYERED BY carTestr.

FREQUENCIES VARIABLES=oloaika sbpmax sbpmin dbpmin dbpmax

/FORMAT=NOTABLE

/NTILES=4

/STATISTICS=STDDEV MINIMUM MAXIMUM MEAN MEDIAN

/ORDER=ANALYSIS.

## Frequencies

[DataSet1] D:\mehehu\mehehu\_datat\_C\tutkimus\projektit\Outi\_1\Outi\_K\polymorfiat.sav

### Statistics

| estr T-alleelin kantaia |    |         | oloaika | sbpmax   | sbpmin   | dbpmin   | dbpmax   |
|-------------------------|----|---------|---------|----------|----------|----------|----------|
| 0                       | N  | Valid   | 9       | 9        | 9        | 9        | 9        |
|                         |    | Missing | 0       | 0        | 0        | 0        | 0        |
| Mean                    |    |         | 5.2222  | 132.8889 | 116.0000 | 71.0000  | 81.0000  |
| Median                  |    |         | 5.0000  | 130.0000 | 115.0000 | 71.0000  | 78.0000  |
| Std. Deviation          |    |         | 1.71594 | 21.25702 | 18.03469 | 10.78193 | 11.80042 |
| Minimum                 |    |         | 3.00    | 106.00   | 94.00    | 58.00    | 65.00    |
| Maximum                 |    |         | 8.00    | 173.00   | 157.00   | 92.00    | 105.00   |
| Percentiles             | 25 |         | 3.5000  | 118.5000 | 103.5000 | 62.0000  | 72.5000  |
|                         |    | 50      | 5.0000  | 130.0000 | 115.0000 | 71.0000  | 78.0000  |
|                         |    | 75      | 6.5000  | 147.0000 | 119.5000 | 77.5000  | 88.0000  |
| ei kanna T-alleelia     |    |         |         |          |          |          |          |
|                         | N  | Valid   | 29      | 29       | 29       | 29       | 29       |
|                         |    | Missing | 0       | 0        | 0        | 0        | 0        |
| Mean                    |    |         | 6.2414  | 143.1379 | 113.3103 | 66.7931  | 89.7241  |
| Median                  |    |         | 7.0000  | 139.0000 | 113.0000 | 68.0000  | 88.0000  |
| Std. Deviation          |    |         | 2.06424 | 23.58075 | 20.46793 | 11.99815 | 12.85606 |
| Minimum                 |    |         | 2.00    | 102.00   | 74.00    | 40.00    | 66.00    |
| Maximum                 |    |         | 10.00   | 204.00   | 170.00   | 91.00    | 120.00   |
| Percentiles             | 25 |         | 4.0000  | 129.0000 | 99.5000  | 60.0000  | 83.0000  |
|                         |    | 50      | 7.0000  | 139.0000 | 113.0000 | 68.0000  | 88.0000  |
|                         |    | 75      | 7.0000  | 156.0000 | 124.5000 | 73.0000  | 100.0000 |
| kanta T-alleelia        |    |         |         |          |          |          |          |
|                         | N  | Valid   | 134     | 133      | 133      | 132      | 133      |
|                         |    | Missing | 0       | 1        | 1        | 2        | 1        |
| Mean                    |    |         | 6.6119  | 140.1955 | 114.4887 | 70.5909  | 87.8947  |
| Median                  |    |         | 6.0000  | 137.0000 | 113.0000 | 70.0000  | 88.0000  |
| Std. Deviation          |    |         | 2.62123 | 19.42915 | 15.37738 | 9.31956  | 11.75782 |
| Minimum                 |    |         | 2.00    | 95.00    | 82.00    | 40.00    | 60.00    |
| Maximum                 |    |         | 15.00   | 210.00   | 162.00   | 100.00   | 113.00   |
| Percentiles             | 25 |         | 5.0000  | 125.5000 | 105.0000 | 64.2500  | 80.0000  |
|                         |    | 50      | 6.0000  | 137.0000 | 113.0000 | 70.0000  | 88.0000  |
|                         |    | 75      | 8.0000  | 150.0000 | 123.0000 | 78.0000  | 95.5000  |

SPLIT FILE OFF.

NPAR TESTS

/M-W= oloaika sbpmax sbpmin dbpmin dbpmax BY carTestr(0 1)

/MISSING ANALYSIS.

## NPar Tests

[DataSet1] D:\mehehu\mehehu\_datat\_C\tutkimus\projektit\Outi\_1\Outi\_K\polymorfia.sav

## Mann-Whitney Test

### Ranks

| estr T-alleelin kantaja |                     | N   | Mean Rank | Sum of Ranks |
|-------------------------|---------------------|-----|-----------|--------------|
| oloaika                 | ei kanna T-alleelia | 29  | 79.48     | 2305.00      |
|                         | kantaa T-alleelia   | 134 | 82.54     | 11061.00     |
|                         | Total               | 163 |           |              |
| sbpmax                  | ei kanna T-alleelia | 29  | 84.95     | 2463.50      |
|                         | kantaa T-alleelia   | 133 | 80.75     | 10739.50     |
|                         | Total               | 162 |           |              |
| sbpmin                  | ei kanna T-alleelia | 29  | 78.55     | 2278.00      |
|                         | kantaa T-alleelia   | 133 | 82.14     | 10925.00     |
|                         | Total               | 162 |           |              |
| dbpmin                  | ei kanna T-alleelia | 29  | 66.57     | 1930.50      |
|                         | kantaa T-alleelia   | 132 | 84.17     | 11110.50     |
|                         | Total               | 161 |           |              |
| dbpmax                  | ei kanna T-alleelia | 29  | 87.05     | 2524.50      |
|                         | kantaa T-alleelia   | 133 | 80.29     | 10678.50     |
|                         | Total               | 162 |           |              |

### Test Statistics<sup>a</sup>

|                        | oloaika  | sbpmax    | sbpmin   | dbpmin   | dbpmax    |
|------------------------|----------|-----------|----------|----------|-----------|
| Mann-Whitney U         | 1870.000 | 1828.500  | 1843.000 | 1495.500 | 1767.500  |
| Wilcoxon W             | 2305.000 | 10739.500 | 2278.000 | 1930.500 | 10678.500 |
| Z                      | -.319    | -.437     | -.374    | -1.843   | -.704     |
| Asymp. Sig. (2-tailed) | .749     | .662      | .709     | .065     | .482      |

a. Grouping Variable: estr T-alleelin kantaja

\*\*\*\*\* carCestr\*\*\*.

SORT CASES BY carCestr.

SPLIT FILE LAYERED BY carCestr.

FREQUENCIES VARIABLES=oloaika sbpmax sbpmin dbpmin dbpmax

/FORMAT=NOTABLE

/NTILES=4

/STATISTICS=STDDEV MINIMUM MAXIMUM MEAN MEDIAN

/ORDER=ANALYSIS.

## Frequencies

[DataSet1] D:\mehehu\mehehu\_datat\_C\tutkimus\projektit\Outi\_1\Outi\_K\polymorfiat.sav

### Statistics

| estr C-alleelin kantaaja |    |         | oloaika | sbpmax   | sbpmin   | dbpmin   | dbpmax   |
|--------------------------|----|---------|---------|----------|----------|----------|----------|
| .00                      | N  | Valid   | 9       | 9        | 9        | 9        | 9        |
|                          |    | Missing | 0       | 0        | 0        | 0        | 0        |
| Mean                     |    |         | 5.2222  | 132.8889 | 116.0000 | 71.0000  | 81.0000  |
| Median                   |    |         | 5.0000  | 130.0000 | 115.0000 | 71.0000  | 78.0000  |
| Std. Deviation           |    |         | 1.71594 | 21.25702 | 18.03469 | 10.78193 | 11.80042 |
| Minimum                  |    |         | 3.00    | 106.00   | 94.00    | 58.00    | 65.00    |
| Maximum                  |    |         | 8.00    | 173.00   | 157.00   | 92.00    | 105.00   |
| Percentiles              | 25 |         | 3.5000  | 118.5000 | 103.5000 | 62.0000  | 72.5000  |
|                          |    | 50      | 5.0000  | 130.0000 | 115.0000 | 71.0000  | 78.0000  |
|                          |    | 75      | 6.5000  | 147.0000 | 119.5000 | 77.5000  | 88.0000  |
| ei ole alleelin kantaja  |    |         |         |          |          |          |          |
|                          | N  | Valid   | 52      | 51       | 51       | 50       | 51       |
|                          |    | Missing | 0       | 1        | 1        | 2        | 1        |
| Mean                     |    |         | 6.5000  | 139.8431 | 113.4902 | 71.1800  | 87.3529  |
| Median                   |    |         | 6.0000  | 136.0000 | 112.0000 | 72.0000  | 88.0000  |
| Std. Deviation           |    |         | 2.85945 | 18.86730 | 14.87733 | 8.40236  | 11.15854 |
| Minimum                  |    |         | 2.00    | 107.00   | 86.00    | 54.00    | 67.00    |
| Maximum                  |    |         | 15.00   | 188.00   | 149.00   | 90.00    | 113.00   |
| Percentiles              | 25 |         | 4.2500  | 125.0000 | 104.0000 | 64.2500  | 78.0000  |
|                          |    | 50      | 6.0000  | 136.0000 | 112.0000 | 72.0000  | 88.0000  |
|                          |    | 75      | 8.0000  | 148.0000 | 120.0000 | 79.0000  | 96.0000  |
| alleelin kantaja         |    |         |         |          |          |          |          |
|                          | N  | Valid   | 111     | 111      | 111      | 111      | 111      |
|                          |    | Missing | 0       | 0        | 0        | 0        | 0        |
| Mean                     |    |         | 6.5676  | 141.1261 | 114.6396 | 69.3333  | 88.6216  |
| Median                   |    |         | 6.0000  | 138.0000 | 113.0000 | 70.0000  | 88.0000  |
| Std. Deviation           |    |         | 2.37265 | 20.83446 | 17.01966 | 10.52040 | 12.31190 |
| Minimum                  |    |         | 2.00    | 95.00    | 74.00    | 40.00    | 60.00    |
| Maximum                  |    |         | 15.00   | 210.00   | 170.00   | 100.00   | 120.00   |
| Percentiles              | 25 |         | 5.0000  | 128.0000 | 104.0000 | 62.0000  | 80.0000  |
|                          |    | 50      | 6.0000  | 138.0000 | 113.0000 | 70.0000  | 88.0000  |
|                          |    | 75      | 8.0000  | 153.0000 | 124.0000 | 77.0000  | 96.0000  |

SPLIT FILE OFF.

NPAR TESTS

/M-W= oloaika sbpmax sbpmin dbpmin dbpmax BY carCestr(0 1)

/MISSING ANALYSIS.

## NPar Tests

[DataSet1] D:\mehehu\mehehu\_datat\_C\tutkimus\projektit\Outi\_1\Outi\_K\polymorfiat.sav

## Mann-Whitney Test

### Ranks

| estr C-alleelin kantaja |                         | N   | Mean Rank | Sum of Ranks |
|-------------------------|-------------------------|-----|-----------|--------------|
| oloaika                 | ei ole alleelin kantaja | 52  | 79.78     | 4148.50      |
|                         | alleelin kantaja        | 111 | 83.04     | 9217.50      |
|                         | Total                   | 163 |           |              |
| sbpmax                  | ei ole alleelin kantaja | 51  | 80.03     | 4081.50      |
|                         | alleelin kantaja        | 111 | 82.18     | 9121.50      |
|                         | Total                   | 162 |           |              |
| sbpmin                  | ei ole alleelin kantaja | 51  | 79.94     | 4077.00      |
|                         | alleelin kantaja        | 111 | 82.22     | 9126.00      |
|                         | Total                   | 162 |           |              |
| dbpmin                  | ei ole alleelin kantaja | 50  | 87.74     | 4387.00      |
|                         | alleelin kantaja        | 111 | 77.96     | 8654.00      |
|                         | Total                   | 161 |           |              |
| dbpmax                  | ei ole alleelin kantaja | 51  | 77.93     | 3974.50      |
|                         | alleelin kantaja        | 111 | 83.14     | 9228.50      |
|                         | Total                   | 162 |           |              |

### Test Statistics<sup>a</sup>

|                        | oloaika  | sbpmax   | sbpmin   | dbpmin   | dbpmax   |
|------------------------|----------|----------|----------|----------|----------|
| Mann-Whitney U         | 2770.500 | 2755.500 | 2751.000 | 2438.000 | 2648.500 |
| Wilcoxon W             | 4148.500 | 4081.500 | 4077.000 | 8654.000 | 3974.500 |
| Z                      | -.415    | -.271    | -.287    | -1.233   | -.657    |
| Asymp. Sig. (2-tailed) | .678     | .787     | .774     | .218     | .511     |

a. Grouping Variable: estr C-alleelin kantaja

\*\*\* DIALYYSI \*\*\*.

CROSSTABS

/TABLES=dialyysi BY enosnum inosnum estrogenum carAinos carGinos carGenos carTenos carT  
estr carCestr

/FORMAT=AVALUE TABLES

/STATISTICS=CHISQ

/CELLS=COUNT COLUMN

/COUNT ROUND CELL.

### Crosstabs

[DataSet1] D:\mehehu\mehehu\_datat\_C\tutkimus\projektit\Outi\_1\Outi\_K\polymorfiat.sav

### Case Processing Summary

|                                                   | Cases |         |         |         |       |         |
|---------------------------------------------------|-------|---------|---------|---------|-------|---------|
|                                                   | Valid |         | Missing |         | Total |         |
|                                                   | N     | Percent | N       | Percent | N     | Percent |
| dialyysi * enosnum                                | 172   | 100.0%  | 0       | 0.0%    | 172   | 100.0%  |
| dialyysi * inosnum                                | 172   | 100.0%  | 0       | 0.0%    | 172   | 100.0%  |
| dialyysi *<br>estrogeenireseptori<br>numeerisesti | 172   | 100.0%  | 0       | 0.0%    | 172   | 100.0%  |
| dialyysi * inos A-alleelin<br>kantaja             | 166   | 96.5%   | 6       | 3.5%    | 172   | 100.0%  |
| dialyysi * inos G-alleelin<br>kantaja             | 166   | 96.5%   | 6       | 3.5%    | 172   | 100.0%  |
| dialyysi * enos G-alleelin<br>kantaja             | 167   | 97.1%   | 5       | 2.9%    | 172   | 100.0%  |
| dialyysi * enos T-alleelin<br>kantaja             | 167   | 97.1%   | 5       | 2.9%    | 172   | 100.0%  |
| dialyysi * estr T-alleelin<br>kantaja             | 163   | 94.8%   | 9       | 5.2%    | 172   | 100.0%  |
| dialyysi * estr C-alleelin<br>kantaja             | 163   | 94.8%   | 9       | 5.2%    | 172   | 100.0%  |

### dialyysi \* enosnum

#### Crosstab

|          |      |                  | enosnum |        |        |          | Total  |
|----------|------|------------------|---------|--------|--------|----------|--------|
|          |      |                  | G       | Both   | T      | Undeterm |        |
| dialyysi | .00  | Count            | 94      | 57     | 9      | 5        | 165    |
|          |      | % within enosnum | 95.9%   | 96.6%  | 90.0%  | 100.0%   | 95.9%  |
|          | 1.00 | Count            | 4       | 2      | 1      | 0        | 7      |
|          |      | % within enosnum | 4.1%    | 3.4%   | 10.0%  | 0.0%     | 4.1%   |
| Total    |      | Count            | 98      | 59     | 10     | 5        | 172    |
|          |      | % within enosnum | 100.0%  | 100.0% | 100.0% | 100.0%   | 100.0% |

### dialyysi \* inosnum

#### Crosstab

|          |      |                  | inosnum |        |        |          | Total  |
|----------|------|------------------|---------|--------|--------|----------|--------|
|          |      |                  | G       | Both   | A      | Undeterm |        |
| dialyysi | .00  | Count            | 102     | 53     | 4      | 6        | 165    |
|          |      | % within inosnum | 95.3%   | 96.4%  | 100.0% | 100.0%   | 95.9%  |
|          | 1.00 | Count            | 5       | 2      | 0      | 0        | 7      |
|          |      | % within inosnum | 4.7%    | 3.6%   | 0.0%   | 0.0%     | 4.1%   |
| Total    |      | Count            | 107     | 55     | 4      | 6        | 172    |
|          |      | % within inosnum | 100.0%  | 100.0% | 100.0% | 100.0%   | 100.0% |

### dialyysi \* estrogenireseptori numeerisesti

**Crosstab**

|          |      |                                                          | estrogeenireseptori numeerisesti |              |              |             | Total         |
|----------|------|----------------------------------------------------------|----------------------------------|--------------|--------------|-------------|---------------|
|          |      |                                                          | T                                | Both         | C            | Undeter     |               |
| dialyysi | .00  | Count<br>% within<br>estrogeenireseptori<br>numeerisesti | 50<br>96.2%                      | 77<br>93.9%  | 29<br>100.0% | 9<br>100.0% | 165<br>95.9%  |
|          | 1.00 | Count<br>% within<br>estrogeenireseptori<br>numeerisesti | 2<br>3.8%                        | 5<br>6.1%    | 0<br>0.0%    | 0<br>0.0%   | 7<br>4.1%     |
| Total    |      | Count<br>% within<br>estrogeenireseptori<br>numeerisesti | 52<br>100.0%                     | 82<br>100.0% | 29<br>100.0% | 9<br>100.0% | 172<br>100.0% |

**dialyysi \* inos A-alleelin kantaja**

**Crosstab**

|          |      |                                              | inos A-alleelin kantaja  |                       | Total         |
|----------|------|----------------------------------------------|--------------------------|-----------------------|---------------|
|          |      |                                              | ei kannaa A-<br>alleelia | kantaa A-<br>alleelia |               |
| dialyysi | .00  | Count<br>% within inos A-alleelin<br>kantaja | 102<br>95.3%             | 57<br>96.6%           | 159<br>95.8%  |
|          | 1.00 | Count<br>% within inos A-alleelin<br>kantaja | 5<br>4.7%                | 2<br>3.4%             | 7<br>4.2%     |
| Total    |      | Count<br>% within inos A-alleelin<br>kantaja | 107<br>100.0%            | 59<br>100.0%          | 166<br>100.0% |

**Chi-Square Tests**

|                                    | Value             | df | Asymp. Sig.<br>(2-sided) | Exact Sig. (2-<br>sided) | Exact Sig. (1-<br>sided) |
|------------------------------------|-------------------|----|--------------------------|--------------------------|--------------------------|
| Pearson Chi-Square                 | .155 <sup>a</sup> | 1  | .694                     |                          |                          |
| Continuity Correction <sup>b</sup> | .000              | 1  | 1.000                    |                          |                          |
| Likelihood Ratio                   | .160              | 1  | .689                     |                          |                          |
| Fisher's Exact Test                |                   |    |                          | 1.000                    | .519                     |
| Linear-by-Linear<br>Association    | .154              | 1  | .695                     |                          |                          |
| N of Valid Cases                   | 166               |    |                          |                          |                          |

a. 2 cells (50.0%) have expected count less than 5. The minimum expected count is 2.49.

b. Computed only for a 2x2 table

**dialyysi \* inos G-alleelin kantaja**

**Crosstab**

|          |      | inos G-alleelin kantaja                   |                   | Total         |               |
|----------|------|-------------------------------------------|-------------------|---------------|---------------|
|          |      | ei kannaa G-alleelia                      | kantaa G-alleelia |               |               |
| dialyysi | .00  | Count<br>% within inos G-alleelin kantaja | 4<br>100.0%       | 155<br>95.7%  | 159<br>95.8%  |
|          | 1.00 | Count<br>% within inos G-alleelin kantaja | 0<br>0.0%         | 7<br>4.3%     | 7<br>4.2%     |
| Total    |      | Count<br>% within inos G-alleelin kantaja | 4<br>100.0%       | 162<br>100.0% | 166<br>100.0% |

**Chi-Square Tests**

|                                    | Value             | df | Asymp. Sig. (2-sided) | Exact Sig. (2-sided) | Exact Sig. (1-sided) |
|------------------------------------|-------------------|----|-----------------------|----------------------|----------------------|
| Pearson Chi-Square                 | .180 <sup>a</sup> | 1  | .671                  | 1.000                | .840                 |
| Continuity Correction <sup>b</sup> | .000              | 1  | 1.000                 |                      |                      |
| Likelihood Ratio                   | .349              | 1  | .555                  |                      |                      |
| Fisher's Exact Test                |                   |    |                       |                      |                      |
| Linear-by-Linear Association       | .179              | 1  | .672                  |                      |                      |
| N of Valid Cases                   | 166               |    |                       |                      |                      |

a. 2 cells (50.0%) have expected count less than 5. The minimum expected count is .17.

b. Computed only for a 2x2 table

**dialyysi \* enos G-alleelin kantaja**

**Crosstab**

|          |      | enos G-alleelin kantaja                   |                   | Total         |               |
|----------|------|-------------------------------------------|-------------------|---------------|---------------|
|          |      | ei kannaa G-alleelia                      | kantaa G-alleelia |               |               |
| dialyysi | .00  | Count<br>% within enos G-alleelin kantaja | 9<br>90.0%        | 151<br>96.2%  | 160<br>95.8%  |
|          | 1.00 | Count<br>% within enos G-alleelin kantaja | 1<br>10.0%        | 6<br>3.8%     | 7<br>4.2%     |
| Total    |      | Count<br>% within enos G-alleelin kantaja | 10<br>100.0%      | 157<br>100.0% | 167<br>100.0% |



### Chi-Square Tests

|                                    | Value             | df | Asymp. Sig. (2-sided) | Exact Sig. (2-sided) | Exact Sig. (1-sided) |
|------------------------------------|-------------------|----|-----------------------|----------------------|----------------------|
| Pearson Chi-Square                 | .894 <sup>a</sup> | 1  | .345                  |                      |                      |
| Continuity Correction <sup>b</sup> | .017              | 1  | .895                  |                      |                      |
| Likelihood Ratio                   | .668              | 1  | .414                  |                      |                      |
| Fisher's Exact Test                |                   |    |                       | .356                 | .356                 |
| Linear-by-Linear Association       | .888              | 1  | .346                  |                      |                      |
| N of Valid Cases                   | 167               |    |                       |                      |                      |

a. 1 cells (25.0%) have expected count less than 5. The minimum expected count is .42.

b. Computed only for a 2x2 table

### dialyysi \* enos T-alleelin kantaja

#### Crosstab

|          |      | enos T-alleelin kantaja                    |                                            | Total                                      |
|----------|------|--------------------------------------------|--------------------------------------------|--------------------------------------------|
|          |      | ei kanna T-alleelia                        | kantaa T-alleelia                          |                                            |
| dialyysi | .00  | Count<br>94                                | Count<br>66                                | Count<br>160                               |
|          |      | % within enos T-alleelin kantaja<br>95.9%  | % within enos T-alleelin kantaja<br>95.7%  | % within enos T-alleelin kantaja<br>95.8%  |
|          | 1.00 | Count<br>4                                 | Count<br>3                                 | Count<br>7                                 |
|          |      | % within enos T-alleelin kantaja<br>4.1%   | % within enos T-alleelin kantaja<br>4.3%   | % within enos T-alleelin kantaja<br>4.2%   |
| Total    |      | Count<br>98                                | Count<br>69                                | Count<br>167                               |
|          |      | % within enos T-alleelin kantaja<br>100.0% | % within enos T-alleelin kantaja<br>100.0% | % within enos T-alleelin kantaja<br>100.0% |

### Chi-Square Tests

|                                    | Value             | df | Asymp. Sig. (2-sided) | Exact Sig. (2-sided) | Exact Sig. (1-sided) |
|------------------------------------|-------------------|----|-----------------------|----------------------|----------------------|
| Pearson Chi-Square                 | .007 <sup>a</sup> | 1  | .933                  |                      |                      |
| Continuity Correction <sup>b</sup> | .000              | 1  | 1.000                 |                      |                      |
| Likelihood Ratio                   | .007              | 1  | .933                  |                      |                      |
| Fisher's Exact Test                |                   |    |                       | 1.000                | .612                 |
| Linear-by-Linear Association       | .007              | 1  | .933                  |                      |                      |
| N of Valid Cases                   | 167               |    |                       |                      |                      |

a. 2 cells (50.0%) have expected count less than 5. The minimum expected count is 2.89.

b. Computed only for a 2x2 table

### dialyysi \* estr T-alleelin kantaja

**Crosstab**

|          |      |                                           | estr T-alleelin kantaja |                   | Total         |
|----------|------|-------------------------------------------|-------------------------|-------------------|---------------|
|          |      |                                           | ei kannaa T-alleelia    | kantaa T-alleelia |               |
| dialyysi | .00  | Count<br>% within estr T-alleelin kantaja | 29<br>100.0%            | 127<br>94.8%      | 156<br>95.7%  |
|          | 1.00 | Count<br>% within estr T-alleelin kantaja | 0<br>0.0%               | 7<br>5.2%         | 7<br>4.3%     |
| Total    |      | Count<br>% within estr T-alleelin kantaja | 29<br>100.0%            | 134<br>100.0%     | 163<br>100.0% |

**Chi-Square Tests**

|                                    | Value              | df | Asymp. Sig. (2-sided) | Exact Sig. (2-sided) | Exact Sig. (1-sided) |
|------------------------------------|--------------------|----|-----------------------|----------------------|----------------------|
| Pearson Chi-Square                 | 1.583 <sup>a</sup> | 1  | .208                  |                      |                      |
| Continuity Correction <sup>b</sup> | .567               | 1  | .451                  |                      |                      |
| Likelihood Ratio                   | 2.810              | 1  | .094                  | .354                 | .247                 |
| Fisher's Exact Test                |                    |    |                       |                      |                      |
| Linear-by-Linear Association       | 1.573              | 1  | .210                  |                      |                      |
| N of Valid Cases                   | 163                |    |                       |                      |                      |

a. 1 cells (25.0%) have expected count less than 5. The minimum expected count is 1.25.

b. Computed only for a 2x2 table

**dialyysi \* estr C-alleelin kantaja**

**Crosstab**

|          |      |                                           | estr C-alleelin kantaja |                  | Total         |
|----------|------|-------------------------------------------|-------------------------|------------------|---------------|
|          |      |                                           | ei ole alleelin kantaja | alleelin kantaja |               |
| dialyysi | .00  | Count<br>% within estr C-alleelin kantaja | 50<br>96.2%             | 106<br>95.5%     | 156<br>95.7%  |
|          | 1.00 | Count<br>% within estr C-alleelin kantaja | 2<br>3.8%               | 5<br>4.5%        | 7<br>4.3%     |
| Total    |      | Count<br>% within estr C-alleelin kantaja | 52<br>100.0%            | 111<br>100.0%    | 163<br>100.0% |

### Chi-Square Tests

|                                    | Value             | df | Asymp. Sig. (2-sided) | Exact Sig. (2-sided) | Exact Sig. (1-sided) |
|------------------------------------|-------------------|----|-----------------------|----------------------|----------------------|
| Pearson Chi-Square                 | .037 <sup>a</sup> | 1  | .847                  |                      |                      |
| Continuity Correction <sup>b</sup> | .000              | 1  | 1.000                 |                      |                      |
| Likelihood Ratio                   | .038              | 1  | .845                  |                      |                      |
| Fisher's Exact Test                |                   |    |                       | 1.000                | .604                 |
| Linear-by-Linear Association       | .037              | 1  | .847                  |                      |                      |
| N of Valid Cases                   | 163               |    |                       |                      |                      |

a. 2 cells (50.0%) have expected count less than 5. The minimum expected count is 2.23.

b. Computed only for a 2x2 table

\*\*\* DIALYYSI puuttuvat poistettu testauksesta\*\*\*.

CROSSTABS

/TABLES=dialyysi BY enosnum inosnum estrogenum

/FORMAT=AVALUE TABLES

/STATISTICS=CHISQ

/CELLS=COUNT COLUMN

/COUNT ROUND CELL.

### Crosstabs

[DataSet1] D:\mehehu\mehehu\_datat\_C\tutkimus\projektit\Outi\_1\Outi\_K\polymorfia.sav

#### Case Processing Summary

|                                                  | Cases |         |         |         |       |         |
|--------------------------------------------------|-------|---------|---------|---------|-------|---------|
|                                                  | Valid |         | Missing |         | Total |         |
|                                                  | N     | Percent | N       | Percent | N     | Percent |
| dialyysi * enosnum                               | 167   | 97.1%   | 5       | 2.9%    | 172   | 100.0%  |
| dialyysi * inosnum                               | 166   | 96.5%   | 6       | 3.5%    | 172   | 100.0%  |
| dialyysi *<br>estrogenireseptori<br>numeerisesti | 163   | 94.8%   | 9       | 5.2%    | 172   | 100.0%  |

### dialyysi \* enosnum

#### Crosstab

|          |      |                  | enosnum |        |        | Total  |
|----------|------|------------------|---------|--------|--------|--------|
|          |      |                  | G       | Both   | T      |        |
| dialyysi | .00  | Count            | 94      | 57     | 9      | 160    |
|          |      | % within enosnum | 95.9%   | 96.6%  | 90.0%  | 95.8%  |
|          | 1.00 | Count            | 4       | 2      | 1      | 7      |
|          |      | % within enosnum | 4.1%    | 3.4%   | 10.0%  | 4.2%   |
| Total    |      | Count            | 98      | 59     | 10     | 167    |
|          |      | % within enosnum | 100.0%  | 100.0% | 100.0% | 100.0% |

### Chi-Square Tests

|                              | Value             | df | Asymp. Sig. (2-sided) |
|------------------------------|-------------------|----|-----------------------|
| Pearson Chi-Square           | .937 <sup>a</sup> | 2  | .626                  |
| Likelihood Ratio             | .717              | 2  | .699                  |
| Linear-by-Linear Association | .190              | 1  | .663                  |
| N of Valid Cases             | 167               |    |                       |

a. 3 cells (50.0%) have expected count less than 5. The minimum expected count is .42.

### dialyysi \* inosnum

#### Crosstab

|          |      |                  | inosnum |        |        | Total  |
|----------|------|------------------|---------|--------|--------|--------|
|          |      |                  | G       | Both   | A      |        |
| dialyysi | .00  | Count            | 102     | 53     | 4      | 159    |
|          |      | % within inosnum | 95.3%   | 96.4%  | 100.0% | 95.8%  |
|          | 1.00 | Count            | 5       | 2      | 0      | 7      |
|          |      | % within inosnum | 4.7%    | 3.6%   | 0.0%   | 4.2%   |
| Total    |      | Count            | 107     | 55     | 4      | 166    |
|          |      | % within inosnum | 100.0%  | 100.0% | 100.0% | 100.0% |

### Chi-Square Tests

|                              | Value             | df | Asymp. Sig. (2-sided) |
|------------------------------|-------------------|----|-----------------------|
| Pearson Chi-Square           | .277 <sup>a</sup> | 2  | .871                  |
| Likelihood Ratio             | .446              | 2  | .800                  |
| Linear-by-Linear Association | .225              | 1  | .635                  |
| N of Valid Cases             | 166               |    |                       |

a. 4 cells (66.7%) have expected count less than 5. The minimum expected count is .17.

### dialyysi \* estrogenireseptori numeerisesti

#### Crosstab

|          |      |                                          | estrogenireseptori numeerisesti |        |        | Total  |
|----------|------|------------------------------------------|---------------------------------|--------|--------|--------|
|          |      |                                          | T                               | Both   | C      |        |
| dialyysi | .00  | Count                                    | 50                              | 77     | 29     | 156    |
|          |      | % within estrogenireseptori numeerisesti | 96.2%                           | 93.9%  | 100.0% | 95.7%  |
|          | 1.00 | Count                                    | 2                               | 5      | 0      | 7      |
|          |      | % within estrogenireseptori numeerisesti | 3.8%                            | 6.1%   | 0.0%   | 4.3%   |
| Total    |      | Count                                    | 52                              | 82     | 29     | 163    |
|          |      | % within estrogenireseptori numeerisesti | 100.0%                          | 100.0% | 100.0% | 100.0% |

### Chi-Square Tests

|                              | Value              | df | Asymp. Sig. (2-sided) |
|------------------------------|--------------------|----|-----------------------|
| Pearson Chi-Square           | 1.975 <sup>a</sup> | 2  | .372                  |
| Likelihood Ratio             | 3.149              | 2  | .207                  |
| Linear-by-Linear Association | .319               | 1  | .572                  |
| N of Valid Cases             | 163                |    |                       |

a. 3 cells (50.0%) have expected count less than 5. The minimum expected count is 1.25.

\*\*\* DIALYYSI puuttuvat poistettu testauksesta\*\*\*.

CROSSTABS

/TABLES=dialyysi BY enosnum inosnum estrogenum

/FORMAT=AVALUE TABLES

/STATISTICS=CHISQ

/CELLS=COUNT COLUMN

/COUNT ROUND CELL

/METHOD=EXACT TIMER(5).

### Crosstabs

[DataSet1] D:\mehehu\mehehu\_datat\_C\tutkimus\projektit\Outi\_1\Outi\_K\polymorfiat.sav

#### Case Processing Summary

|                                            | Cases |         |         |         |       |         |
|--------------------------------------------|-------|---------|---------|---------|-------|---------|
|                                            | Valid |         | Missing |         | Total |         |
|                                            | N     | Percent | N       | Percent | N     | Percent |
| dialyysi * enosnum                         | 167   | 97.1%   | 5       | 2.9%    | 172   | 100.0%  |
| dialyysi * inosnum                         | 166   | 96.5%   | 6       | 3.5%    | 172   | 100.0%  |
| dialyysi * estrogenireseptori numeerisesti | 163   | 94.8%   | 9       | 5.2%    | 172   | 100.0%  |

### dialyysi \* enosnum

#### Crosstab

|          |      |                  | enosnum |        |        | Total  |
|----------|------|------------------|---------|--------|--------|--------|
|          |      |                  | G       | Both   | T      |        |
| dialyysi | .00  | Count            | 94      | 57     | 9      | 160    |
|          |      | % within enosnum | 95.9%   | 96.6%  | 90.0%  | 95.8%  |
|          | 1.00 | Count            | 4       | 2      | 1      | 7      |
|          |      | % within enosnum | 4.1%    | 3.4%   | 10.0%  | 4.2%   |
| Total    |      | Count            | 98      | 59     | 10     | 167    |
|          |      | % within enosnum | 100.0%  | 100.0% | 100.0% | 100.0% |

### Chi-Square Tests

|                              | Value             | df | Asymp. Sig. (2-sided) | Exact Sig. (2-sided) | Exact Sig. (1-sided) | Point Probability |
|------------------------------|-------------------|----|-----------------------|----------------------|----------------------|-------------------|
| Pearson Chi-Square           | .937 <sup>a</sup> | 2  | .626                  | .631                 |                      |                   |
| Likelihood Ratio             | .717              | 2  | .699                  | 1.000                |                      |                   |
| Fisher's Exact Test          | 1.559             |    |                       | .423                 |                      |                   |
| Linear-by-Linear Association | .190 <sup>b</sup> | 1  | .663                  | .751                 | .431                 | .212              |
| N of Valid Cases             | 167               |    |                       |                      |                      |                   |

a. 3 cells (50.0%) have expected count less than 5. The minimum expected count is .42.

b. The standardized statistic is .436.

### dialyysi \* inosnum

#### Crosstab

|          |      | inosnum          |        |        | Total  |        |
|----------|------|------------------|--------|--------|--------|--------|
|          |      | G                | Both   | A      |        |        |
| dialyysi | .00  | Count            | 102    | 53     | 4      | 159    |
|          |      | % within inosnum | 95.3%  | 96.4%  | 100.0% | 95.8%  |
|          | 1.00 | Count            | 5      | 2      | 0      | 7      |
|          |      | % within inosnum | 4.7%   | 3.6%   | 0.0%   | 4.2%   |
| Total    |      | Count            | 107    | 55     | 4      | 166    |
|          |      | % within inosnum | 100.0% | 100.0% | 100.0% | 100.0% |

### Chi-Square Tests

|                              | Value             | df | Asymp. Sig. (2-sided) | Exact Sig. (2-sided) | Exact Sig. (1-sided) | Point Probability |
|------------------------------|-------------------|----|-----------------------|----------------------|----------------------|-------------------|
| Pearson Chi-Square           | .277 <sup>a</sup> | 2  | .871                  | 1.000                |                      |                   |
| Likelihood Ratio             | .446              | 2  | .800                  | 1.000                |                      |                   |
| Fisher's Exact Test          | .479              |    |                       | 1.000                |                      |                   |
| Linear-by-Linear Association | .225 <sup>b</sup> | 1  | .635                  | .738                 | .479                 | .272              |
| N of Valid Cases             | 166               |    |                       |                      |                      |                   |

a. 4 cells (66.7%) have expected count less than 5. The minimum expected count is .17.

b. The standardized statistic is -.475.

### dialyysi \* estrogenireseptori numeerisesti

**Crosstab**

|          |      |                                                         | estrogenireseptori numeerisesti |              |              | Total         |
|----------|------|---------------------------------------------------------|---------------------------------|--------------|--------------|---------------|
|          |      |                                                         | T                               | Both         | C            |               |
| dialyysi | .00  | Count<br>% within<br>estrogenireseptori<br>numeerisesti | 50<br>96.2%                     | 77<br>93.9%  | 29<br>100.0% | 156<br>95.7%  |
|          | 1.00 | Count<br>% within<br>estrogenireseptori<br>numeerisesti | 2<br>3.8%                       | 5<br>6.1%    | 0<br>0.0%    | 7<br>4.3%     |
| Total    |      | Count<br>% within<br>estrogenireseptori<br>numeerisesti | 52<br>100.0%                    | 82<br>100.0% | 29<br>100.0% | 163<br>100.0% |

**Chi-Square Tests**

|                                 | Value              | df | Asymp. Sig.<br>(2-sided) | Exact Sig. (2-<br>sided) | Exact Sig. (1-<br>sided) | Point<br>Probability |
|---------------------------------|--------------------|----|--------------------------|--------------------------|--------------------------|----------------------|
| Pearson Chi-Square              | 1.975 <sup>a</sup> | 2  | .372                     | .402                     |                          |                      |
| Likelihood Ratio                | 3.149              | 2  | .207                     | .291                     |                          |                      |
| Fisher's Exact Test             | 1.454              |    |                          | .458                     |                          |                      |
| Linear-by-Linear<br>Association | .319 <sup>b</sup>  | 1  | .572                     | .595                     | .392                     | .192                 |
| N of Valid Cases                | 163                |    |                          |                          |                          |                      |

a. 3 cells (50.0%) have expected count less than 5. The minimum expected count is 1.25.

b. The standardized statistic is -.565.
