# Supplementary material for: Endothelial Nitric Oxide Synthase G894T Polymorphism Associates with Disease Severity in Puumala Hantavirus Infection
Source: PubMed Central journal article supplement (PMC4641644; doi:10.1371/journal.pone.0142872), 2015-11-11
Supplement: pone.0142872.s002.pdf [file pone.0142872.s002.pdf]

\*\*\*\*\*

\* ENOS \*

\*\*\*\*\*

\*\*\* carrrier T enos \*\*\*\*\*.

SORT CASES BY carTenos.

SPLIT FILE LAYERED BY carTenos.

FREQUENCIES VARIABLES=kreamax bleukmax painoero trombmin hkrmin hkrmax pil6  
max crpmax

/FORMAT=NOTABLE

/NTILES=4

/STATISTICS=STDDEV MINIMUM MAXIMUM MEAN MEDIAN

/ORDER=ANALYSIS.

## Frequencies

[DataSet1] G:\polymorfiat.sav

### Statistics

| enos T-alleelin kantaja |             |                | kreamax   | bleukmax | painoero | trombmin |
|-------------------------|-------------|----------------|-----------|----------|----------|----------|
| ei kanna T-alleelia     | N           | Valid          | 98        | 98       | 96       | 98       |
|                         |             | Missing        | 0         | 0        | 2        | 0        |
|                         |             | Mean           | 284.6735  | 11.0286  | 2.7958   | 70.8061  |
|                         |             | Median         | 166.0000  | 9.5500   | 2.2500   | 65.5000  |
|                         |             | Std. Deviation | 272.19440 | 4.69009  | 2.36108  | 38.92331 |
|                         |             | Minimum        | 51.00     | 4.40     | .00      | 3.00     |
|                         |             | Maximum        | 1499.00   | 31.20    | 10.40    | 198.00   |
|                         | Percentiles | 25             | 95.7500   | 7.6750   | .9000    | 42.7500  |
|                         |             | 50             | 166.0000  | 9.5500   | 2.2500   | 65.5000  |
|                         |             | 75             | 381.0000  | 12.9250  | 3.8000   | 90.2500  |
| kantaa T-alleelia       | N           | Valid          | 69        | 69       | 67       | 69       |
|                         |             | Missing        | 0         | 0        | 2        | 0        |
|                         |             | Mean           | 301.7826  | 11.7058  | 3.1149   | 61.8986  |
|                         |             | Median         | 237.0000  | 10.3000  | 2.1000   | 57.0000  |
|                         |             | Std. Deviation | 263.23133 | 5.11595  | 2.97659  | 36.80719 |
|                         |             | Minimum        | 61.00     | 3.90     | .00      | 9.00     |
|                         |             | Maximum        | 1285.00   | 26.80    | 12.00    | 238.00   |
|                         | Percentiles | 25             | 101.5000  | 7.7000   | .8000    | 38.0000  |
|                         |             | 50             | 237.0000  | 10.3000  | 2.1000   | 57.0000  |
|                         |             | 75             | 401.5000  | 13.7500  | 4.4000   | 80.0000  |

**Statistics**

| enos T-alleelin kantaja |             |                | hkrmin | hkrmax | pil6max  | crpmax   |
|-------------------------|-------------|----------------|--------|--------|----------|----------|
| ei kanna T-alleelia     | N           | Valid          | 98     | 98     | 62       | 98       |
|                         |             | Missing        | 0      | 0      | 36       | 0        |
|                         |             | Mean           | .3564  | .4379  | 21.0292  | 81.6357  |
|                         |             | Median         | .3550  | .4400  | 14.8500  | 68.8500  |
|                         |             | Std. Deviation | .04011 | .05039 | 17.27461 | 51.35631 |
|                         |             | Minimum        | .25    | .34    | 1.52     | 11.00    |
|                         |             | Maximum        | .46    | .59    | 107.00   | 269.20   |
|                         | Percentiles | 25             | .3300  | .4000  | 10.5400  | 40.0000  |
|                         |             | 50             | .3550  | .4400  | 14.8500  | 68.8500  |
|                         |             | 75             | .3900  | .4700  | 26.7750  | 112.1250 |
| kattaa T-alleelia       | N           | Valid          | 69     | 69     | 53       | 69       |
|                         |             | Missing        | 0      | 0      | 16       | 0        |
|                         |             | Mean           | .3543  | .4461  | 17.4808  | 92.4290  |
|                         |             | Median         | .3600  | .4400  | 13.7000  | 84.8000  |
|                         |             | Std. Deviation | .04268 | .05849 | 15.46535 | 57.32993 |
|                         |             | Minimum        | .25    | .33    | 1.31     | 16.30    |
|                         |             | Maximum        | .44    | .60    | 96.60    | 266.80   |
|                         | Percentiles | 25             | .3250  | .4100  | 7.0900   | 43.1000  |
|                         |             | 50             | .3600  | .4400  | 13.7000  | 84.8000  |
|                         |             | 75             | .3800  | .4800  | 24.4000  | 125.5500 |

SPLIT FILE OFF.

NPART TESTS

```

/M-W= kreamax bleukmax painoero trombmin hkrmin hkrmax pil6max crpmax BY
carTenos(0 1)
/MISSING ANALYSIS.

```

**NPar Tests**

[DataSet1] G:\polymorfiat.sav

**Mann-Whitney Test**

**Ranks**

|          | enos T-alleelin kantaja | N   | Mean Rank | Sum of Ranks |
|----------|-------------------------|-----|-----------|--------------|
| kreamax  | ei kannaa T-alleelia    | 98  | 81.59     | 7995.50      |
|          | kantaa T-alleelia       | 69  | 87.43     | 6032.50      |
|          | Total                   | 167 |           |              |
| bleukmax | ei kannaa T-alleelia    | 98  | 81.76     | 8012.00      |
|          | kantaa T-alleelia       | 69  | 87.19     | 6016.00      |
|          | Total                   | 167 |           |              |
| painoero | ei kannaa T-alleelia    | 96  | 81.91     | 7863.50      |
|          | kantaa T-alleelia       | 67  | 82.13     | 5502.50      |
|          | Total                   | 163 |           |              |
| trombmin | ei kannaa T-alleelia    | 98  | 88.83     | 8705.00      |
|          | kantaa T-alleelia       | 69  | 77.14     | 5323.00      |
|          | Total                   | 167 |           |              |
| hkrmin   | ei kannaa T-alleelia    | 98  | 83.91     | 8223.50      |
|          | kantaa T-alleelia       | 69  | 84.12     | 5804.50      |
|          | Total                   | 167 |           |              |
| hkrmax   | ei kannaa T-alleelia    | 98  | 82.10     | 8045.50      |
|          | kantaa T-alleelia       | 69  | 86.70     | 5982.50      |
|          | Total                   | 167 |           |              |
| pil6max  | ei kannaa T-alleelia    | 62  | 62.56     | 3878.50      |
|          | kantaa T-alleelia       | 53  | 52.67     | 2791.50      |
|          | Total                   | 115 |           |              |
| crpmax   | ei kannaa T-alleelia    | 98  | 80.37     | 7876.50      |
|          | kantaa T-alleelia       | 69  | 89.15     | 6151.50      |
|          | Total                   | 167 |           |              |

**Test Statistics<sup>a</sup>**

|                        | kreamax  | bleukmax | painoero | trombmin | hkrmin   | hkrmax   |
|------------------------|----------|----------|----------|----------|----------|----------|
| Mann-Whitney U         | 3144.500 | 3161.000 | 3207.500 | 2908.000 | 3372.500 | 3194.500 |
| Wilcoxon W             | 7995.500 | 8012.000 | 7863.500 | 5323.000 | 8223.500 | 8045.500 |
| Z                      | -.769    | -.715    | -.029    | -1.537   | -.028    | -.607    |
| Asymp. Sig. (2-tailed) | .442     | .475     | .977     | .124     | .978     | .544     |

**Test Statistics<sup>a</sup>**

|                        | pil6max  | crpmax   |
|------------------------|----------|----------|
| Mann-Whitney U         | 1360.500 | 3025.500 |
| Wilcoxon W             | 2791.500 | 7876.500 |
| Z                      | -1.585   | -1.155   |
| Asymp. Sig. (2-tailed) | .113     | .248     |

a. Grouping Variable: enos T-alleelin kantaja

```

*** carrrier G enos *****.
SORT CASES BY carGenos.
SPLIT FILE LAYERED BY carGenos.

```

```

FREQUENCIES VARIABLES=kreamax bleukmax painoero trombmin hkrmin hkrmax pil6
max crpmax
  /FORMAT=NOTABLE
  /NTILES=4
  /STATISTICS=STDDEV MINIMUM MAXIMUM MEAN MEDIAN
  /ORDER=ANALYSIS.

```

## Frequencies

[DataSet1] G:\polymorfiat.sav

### Statistics

| enos G-alleelin kantaja |             |                | kreamax   | bleukmax | painoero | trombmin |
|-------------------------|-------------|----------------|-----------|----------|----------|----------|
| ei kanna G-alleelia     | N           | Valid          | 10        | 10       | 10       | 10       |
|                         |             | Missing        | 0         | 0        | 0        | 0        |
|                         |             | Mean           | 478.5000  | 14.1800  | 3.8900   | 59.1000  |
|                         |             | Median         | 325.5000  | 12.9000  | 3.5500   | 46.5000  |
|                         |             | Std. Deviation | 329.99369 | 5.85544  | 2.84427  | 46.85782 |
|                         |             | Minimum        | 102.00    | 8.10     | .00      | 13.00    |
|                         |             | Maximum        | 1041.00   | 26.80    | 7.30     | 172.00   |
|                         | Percentiles | 25             | 240.0000  | 9.5750   | 1.1000   | 23.5000  |
|                         |             | 50             | 325.5000  | 12.9000  | 3.5500   | 46.5000  |
|                         |             | 75             | 816.5000  | 18.5000  | 6.8750   | 81.5000  |
| kantaa G-alleelia       | N           | Valid          | 157       | 157      | 153      | 157      |
|                         |             | Missing        | 0         | 0        | 4        | 0        |
|                         |             | Mean           | 279.8471  | 11.1255  | 2.8641   | 67.6369  |
|                         |             | Median         | 175.0000  | 9.9000   | 2.1000   | 61.0000  |
|                         |             | Std. Deviation | 260.16847 | 4.76078  | 2.61032  | 37.71080 |
|                         |             | Minimum        | 51.00     | 3.90     | .00      | 3.00     |
|                         |             | Maximum        | 1499.00   | 31.20    | 12.00    | 238.00   |
|                         | Percentiles | 25             | 97.0000   | 7.6000   | .9000    | 42.5000  |
|                         |             | 50             | 175.0000  | 9.9000   | 2.1000   | 61.0000  |
|                         |             | 75             | 374.5000  | 13.1000  | 3.8000   | 86.0000  |

**Statistics**

| enos G-alleelin kantaja |             |                | hkrmin | hkrmax | pil6max  | crpmax   |
|-------------------------|-------------|----------------|--------|--------|----------|----------|
| ei kanna G-alleelia     | N           | Valid          | 10     | 10     | 9        | 10       |
|                         |             | Missing        | 0      | 0      | 1        | 0        |
|                         |             | Mean           | .3420  | .4840  | 22.6022  | 91.2300  |
|                         |             | Median         | .3400  | .4900  | 13.9000  | 83.3500  |
|                         |             | Std. Deviation | .05391 | .06186 | 28.86161 | 70.46671 |
|                         |             | Minimum        | .25    | .39    | 3.58     | 16.70    |
|                         |             | Maximum        | .42    | .59    | 96.60    | 214.00   |
|                         | Percentiles | 25             | .3050  | .4275  | 7.5250   | 25.5500  |
|                         |             | 50             | .3400  | .4900  | 13.9000  | 83.3500  |
|                         |             | 75             | .3825  | .5325  | 24.5500  | 149.7750 |
| kantaa G-alleelia       | N           | Valid          | 157    | 157    | 106      | 157      |
|                         |             | Missing        | 0      | 0      | 51       | 0        |
|                         |             | Mean           | .3564  | .4385  | 19.1214  | 85.7682  |
|                         |             | Median         | .3600  | .4400  | 14.6000  | 75.0000  |
|                         |             | Std. Deviation | .04019 | .05236 | 15.19263 | 53.05284 |
|                         |             | Minimum        | .25    | .33    | 1.31     | 11.00    |
|                         |             | Maximum        | .46    | .60    | 107.00   | 269.20   |
|                         | Percentiles | 25             | .3300  | .4000  | 8.8600   | 42.4000  |
|                         |             | 50             | .3600  | .4400  | 14.6000  | 75.0000  |
|                         |             | 75             | .3850  | .4700  | 25.1000  | 118.5000 |

SPLIT FILE OFF.

NPAR TESTS

```
/M-W= kreamax bleukmax painoero trombmin hkrmin hkrmax pil6max crpmax BY
carGenos(0 1)
/MISSING ANALYSIS.
```

## NPar Tests

[DataSet1] G:\polymorfiat.sav

## Mann-Whitney Test

**Ranks**

|          | enos G-alleelin kantaja | N   | Mean Rank | Sum of Ranks |
|----------|-------------------------|-----|-----------|--------------|
| kreamax  | ei kanna G-alleelia     | 10  | 119.05    | 1190.50      |
|          | kantaa G-alleelia       | 157 | 81.77     | 12837.50     |
|          | Total                   | 167 |           |              |
| bleukmax | ei kanna G-alleelia     | 10  | 113.50    | 1135.00      |
|          | kantaa G-alleelia       | 157 | 82.12     | 12893.00     |
|          | Total                   | 167 |           |              |
| painoero | ei kanna G-alleelia     | 10  | 98.40     | 984.00       |
|          | kantaa G-alleelia       | 153 | 80.93     | 12382.00     |
|          | Total                   | 163 |           |              |
| trombmin | ei kanna G-alleelia     | 10  | 68.10     | 681.00       |
|          | kantaa G-alleelia       | 157 | 85.01     | 13347.00     |
|          | Total                   | 167 |           |              |
| hkrmin   | ei kanna G-alleelia     | 10  | 69.30     | 693.00       |
|          | kantaa G-alleelia       | 157 | 84.94     | 13335.00     |
|          | Total                   | 167 |           |              |
| hkrmax   | ei kanna G-alleelia     | 10  | 117.20    | 1172.00      |
|          | kantaa G-alleelia       | 157 | 81.89     | 12856.00     |
|          | Total                   | 167 |           |              |
| pil6max  | ei kanna G-alleelia     | 9   | 53.22     | 479.00       |
|          | kantaa G-alleelia       | 106 | 58.41     | 6191.00      |
|          | Total                   | 115 |           |              |
| crpmax   | ei kanna G-alleelia     | 10  | 82.60     | 826.00       |
|          | kantaa G-alleelia       | 157 | 84.09     | 13202.00     |
|          | Total                   | 167 |           |              |

**Test Statistics<sup>a</sup>**

|                        | kreamax   | bleukmax  | painoero  | trombmin | hkrmin  | hkrmax    |
|------------------------|-----------|-----------|-----------|----------|---------|-----------|
| Mann-Whitney U         | 434.500   | 490.000   | 601.000   | 626.000  | 638.000 | 453.000   |
| Wilcoxon W             | 12837.500 | 12893.000 | 12382.000 | 681.000  | 693.000 | 12856.000 |
| Z                      | -2.364    | -1.990    | -1.135    | -1.073   | -.994   | -2.244    |
| Asymp. Sig. (2-tailed) | .018      | .047      | .257      | .283     | .320    | .025      |

**Test Statistics<sup>a</sup>**

|                        | pil6max | crpmax  |
|------------------------|---------|---------|
| Mann-Whitney U         | 434.000 | 771.000 |
| Wilcoxon W             | 479.000 | 826.000 |
| Z                      | -.448   | -.094   |
| Asymp. Sig. (2-tailed) | .654    | .925    |

a. Grouping Variable: enos G-alleelin kantaja

SPLIT FILE OFF.

\*\*\* enos \*\*\*\*\*.

SORT CASES BY enosnum.

SPLIT FILE LAYERED BY enosnum.

FREQUENCIES VARIABLES=kreamax bleukmax painoero trombmin hkrmin hkrmax pil6  
max crpmax

/FORMAT=NOTABLE

/NTILES=4

/STATISTICS=STDDEV MINIMUM MAXIMUM MEAN MEDIAN

/ORDER=ANALYSIS.

## Frequencies

[DataSet1] G:\polymorfiat.sav

**Statistics**

| enosnum  |   |                | kreamax   | bleukmax | painoero | trombmin |         |
|----------|---|----------------|-----------|----------|----------|----------|---------|
| G        | N | Valid          | 98        | 98       | 96       | 98       |         |
|          |   | Missing        | 0         | 0        | 2        | 0        |         |
|          |   | Mean           | 284.6735  | 11.0286  | 2.7958   | 70.8061  |         |
|          |   | Median         | 166.0000  | 9.5500   | 2.2500   | 65.5000  |         |
|          |   | Std. Deviation | 272.19440 | 4.69009  | 2.36108  | 38.92331 |         |
|          |   | Minimum        | 51.00     | 4.40     | .00      | 3.00     |         |
|          |   | Maximum        | 1499.00   | 31.20    | 10.40    | 198.00   |         |
|          |   | Percentiles    | 25        | 95.7500  | 7.6750   | .9000    | 42.7500 |
|          |   |                | 50        | 166.0000 | 9.5500   | 2.2500   | 65.5000 |
|          |   |                | 75        | 381.0000 | 12.9250  | 3.8000   | 90.2500 |
| Both     | N | Valid          | 59        | 59       | 57       | 59       |         |
|          |   | Missing        | 0         | 0        | 2        | 0        |         |
|          |   | Mean           | 271.8305  | 11.2864  | 2.9789   | 62.3729  |         |
|          |   | Median         | 196.0000  | 10.2000  | 1.9000   | 57.0000  |         |
|          |   | Std. Deviation | 240.92087 | 4.91232  | 3.00266  | 35.29965 |         |
|          |   | Minimum        | 61.00     | 3.90     | .00      | 9.00     |         |
|          |   | Maximum        | 1285.00   | 24.00    | 12.00    | 238.00   |         |
|          |   | Percentiles    | 25        | 97.0000  | 7.2000   | .7500    | 42.0000 |
|          |   |                | 50        | 196.0000 | 10.2000  | 1.9000   | 57.0000 |
|          |   |                | 75        | 369.0000 | 13.6000  | 3.8000   | 79.0000 |
| T        | N | Valid          | 10        | 10       | 10       | 10       |         |
|          |   | Missing        | 0         | 0        | 0        | 0        |         |
|          |   | Mean           | 478.5000  | 14.1800  | 3.8900   | 59.1000  |         |
|          |   | Median         | 325.5000  | 12.9000  | 3.5500   | 46.5000  |         |
|          |   | Std. Deviation | 329.99369 | 5.85544  | 2.84427  | 46.85782 |         |
|          |   | Minimum        | 102.00    | 8.10     | .00      | 13.00    |         |
|          |   | Maximum        | 1041.00   | 26.80    | 7.30     | 172.00   |         |
|          |   | Percentiles    | 25        | 240.0000 | 9.5750   | 1.1000   | 23.5000 |
|          |   |                | 50        | 325.5000 | 12.9000  | 3.5500   | 46.5000 |
|          |   |                | 75        | 816.5000 | 18.5000  | 6.8750   | 81.5000 |
| Undeterm | N | Valid          | 5         | 5        | 5        | 5        |         |
|          |   | Missing        | 0         | 0        | 0        | 0        |         |
|          |   | Mean           | 163.6000  | 11.0800  | 1.7400   | 93.2000  |         |
|          |   | Median         | 143.0000  | 11.1000  | 2.0000   | 89.0000  |         |
|          |   | Std. Deviation | 124.85311 | 1.80472  | 1.41704  | 21.05232 |         |
|          |   | Minimum        | 58.00     | 8.90     | .40      | 69.00    |         |
|          |   | Maximum        | 368.00    | 13.40    | 3.80     | 127.00   |         |



**Statistics**

| enosnum  |    |                | hkrmin | hkrmx  | pil6max  | crpmax   |         |
|----------|----|----------------|--------|--------|----------|----------|---------|
| G        | N  | Valid          | 98     | 98     | 62       | 98       |         |
|          |    | Missing        | 0      | 0      | 36       | 0        |         |
|          |    | Mean           | .3564  | .4379  | 21.0292  | 81.6357  |         |
|          |    | Median         | .3550  | .4400  | 14.8500  | 68.8500  |         |
|          |    | Std. Deviation | .04011 | .05039 | 17.27461 | 51.35631 |         |
|          |    | Minimum        | .25    | .34    | 1.52     | 11.00    |         |
|          |    | Maximum        | .46    | .59    | 107.00   | 269.20   |         |
|          |    | Percentiles    | 25     | .3300  | .4000    | 10.5400  | 40.0000 |
|          | 50 |                | .3550  | .4400  | 14.8500  | 68.8500  |         |
|          | 75 |                | .3900  | .4700  | 26.7750  | 112.1250 |         |
| Both     | N  | Valid          | 59     | 59     | 44       | 59       |         |
|          |    | Missing        | 0      | 0      | 15       | 0        |         |
|          |    | Mean           | .3564  | .4397  | 16.4332  | 92.6322  |         |
|          |    | Median         | .3600  | .4300  | 12.3700  | 85.9000  |         |
|          |    | Std. Deviation | .04067 | .05592 | 11.29820 | 55.52107 |         |
|          |    | Minimum        | .25    | .33    | 1.31     | 16.30    |         |
|          |    | Maximum        | .44    | .60    | 54.74    | 266.80   |         |
|          |    | Percentiles    | 25     | .3300  | .4000    | 7.0050   | 45.0000 |
|          | 50 |                | .3600  | .4300  | 12.3700  | 85.9000  |         |
|          | 75 |                | .3800  | .4700  | 24.6500  | 124.1000 |         |
| T        | N  | Valid          | 10     | 10     | 9        | 10       |         |
|          |    | Missing        | 0      | 0      | 1        | 0        |         |
|          |    | Mean           | .3420  | .4840  | 22.6022  | 91.2300  |         |
|          |    | Median         | .3400  | .4900  | 13.9000  | 83.3500  |         |
|          |    | Std. Deviation | .05391 | .06186 | 28.86161 | 70.46671 |         |
|          |    | Minimum        | .25    | .39    | 3.58     | 16.70    |         |
|          |    | Maximum        | .42    | .59    | 96.60    | 214.00   |         |
|          |    | Percentiles    | 25     | .3050  | .4275    | 7.5250   | 25.5500 |
|          | 50 |                | .3400  | .4900  | 13.9000  | 83.3500  |         |
|          | 75 |                | .3825  | .5325  | 24.5500  | 149.7750 |         |
| Undeterm | N  | Valid          | 5      | 5      | 3        | 5        |         |
|          |    | Missing        | 0      | 0      | 2        | 0        |         |
|          |    | Mean           | .3800  | .4300  | 15.9167  | 63.6400  |         |
|          |    | Median         | .3800  | .4200  | 12.5000  | 75.0000  |         |
|          |    | Std. Deviation | .02000 | .04062 | 6.10936  | 37.09809 |         |
|          |    | Minimum        | .36    | .39    | 12.28    | 22.00    |         |
|          |    | Maximum        | .40    | .49    | 22.97    | 102.60   |         |

### Statistics

| enosnum  |             |    | kreamax  | bleukmax | painoero | trombmin |
|----------|-------------|----|----------|----------|----------|----------|
| Undeterm | Percentiles | 25 | 64.0000  | 9.3500   | .4000    | 78.5000  |
|          |             | 50 | 143.0000 | 11.1000  | 2.0000   | 89.0000  |
|          |             | 75 | 273.5000 | 12.8000  | 2.9500   | 110.0000 |

### Statistics

| enosnum  |             |    | hkrmin | hkrmax | pil6max | crpmax  |
|----------|-------------|----|--------|--------|---------|---------|
| Undeterm | Percentiles | 25 | .3600  | .3950  | 12.2800 | 24.5000 |
|          |             | 50 | .3800  | .4200  | 12.5000 | 75.0000 |
|          |             | 75 | .4000  | .4700  | .       | 97.1000 |

SPLIT FILE OFF.

NPAR TESTS

/K-W=kreamax bleukmax painoero trombmin hkrmin hkrmax pil6max crpmax BY e  
nosnum(1 3)

/MISSING ANALYSIS.

## NPar Tests

[DataSet1] G:\polymorfiat.sav

## Kruskal-Wallis Test

**Ranks**

|          | enosnum | N   | Mean Rank |
|----------|---------|-----|-----------|
| kreamax  | G       | 98  | 81.59     |
|          | Both    | 59  | 82.07     |
|          | T       | 10  | 119.05    |
|          | Total   | 167 |           |
| bleukmax | G       | 98  | 81.76     |
|          | Both    | 59  | 82.73     |
|          | T       | 10  | 113.50    |
|          | Total   | 167 |           |
| painoero | G       | 96  | 81.91     |
|          | Both    | 57  | 79.27     |
|          | T       | 10  | 98.40     |
|          | Total   | 163 |           |
| trombmin | G       | 98  | 88.83     |
|          | Both    | 59  | 78.68     |
|          | T       | 10  | 68.10     |
|          | Total   | 167 |           |
| hkrmin   | G       | 98  | 83.91     |
|          | Both    | 59  | 86.64     |
|          | T       | 10  | 69.30     |
|          | Total   | 167 |           |
| hkrmax   | G       | 98  | 82.10     |
|          | Both    | 59  | 81.53     |
|          | T       | 10  | 117.20    |
|          | Total   | 167 |           |
| pil6max  | G       | 62  | 62.56     |
|          | Both    | 44  | 52.56     |
|          | T       | 9   | 53.22     |
|          | Total   | 115 |           |
| crpmax   | G       | 98  | 80.37     |
|          | Both    | 59  | 90.26     |
|          | T       | 10  | 82.60     |
|          | Total   | 167 |           |

**Test Statistics<sup>a,b</sup>**

|             | kreamax | bleukmax | painoero | trombmin | hkrmin | hkrmax |
|-------------|---------|----------|----------|----------|--------|--------|
| Chi-Square  | 5.593   | 3.975    | 1.399    | 2.773    | 1.106  | 5.039  |
| df          | 2       | 2        | 2        | 2        | 2      | 2      |
| Asymp. Sig. | .061    | .137     | .497     | .250     | .575   | .081   |

**Test Statistics<sup>a,b</sup>**

|             | pil6max | crpmax |
|-------------|---------|--------|
| Chi-Square  | 2.515   | 1.550  |
| df          | 2       | 2      |
| Asymp. Sig. | .284    | .461   |

a. Kruskal Wallis Test

b. Grouping Variable: enosnum
