# Supplementary material for: Endothelial Nitric Oxide Synthase G894T Polymorphism Associates with Disease Severity in Puumala Hantavirus Infection
Source: PubMed Central journal article supplement (PMC4641644; doi:10.1371/journal.pone.0142872), 2015-11-11
Supplement: pone.0142872.s003.pdf [file pone.0142872.s003.pdf]

```

GET
  FILE='G:\polymorfiat.sav'.
DATASET NAME DataSet1 WINDOW=FRONT.
FREQUENCIES VARIABLES=carAinos carGinos inosnum carGenos carTenos enosnum
  /ORDER=ANALYSIS.

```

## Frequencies

[DataSet1] G:\polymorfiat.sav

### Statistics

|   |         | inos A-alleelin kantaja | inos G-alleelin kantaja | inosnum | enos G-alleelin kantaja |
|---|---------|-------------------------|-------------------------|---------|-------------------------|
| N | Valid   | 166                     | 166                     | 172     | 167                     |
|   | Missing | 6                       | 6                       | 0       | 5                       |

### Statistics

|   |         | enos T-alleelin kantaja | enosnum |
|---|---------|-------------------------|---------|
| N | Valid   | 167                     | 172     |
|   | Missing | 5                       | 0       |

## Frequency Table

### inos A-alleelin kantaja

|         |                      | Frequency | Percent | Valid Percent | Cumulative Percent |
|---------|----------------------|-----------|---------|---------------|--------------------|
| Valid   | ei kannaa A-alleelia | 107       | 62.2    | 64.5          | 64.5               |
|         | kantaa A-alleelia    | 59        | 34.3    | 35.5          | 100.0              |
|         | Total                | 166       | 96.5    | 100.0         |                    |
| Missing | System               | 6         | 3.5     |               |                    |
| Total   |                      | 172       | 100.0   |               |                    |

### inos G-alleelin kantaja

|         |                      | Frequency | Percent | Valid Percent | Cumulative Percent |
|---------|----------------------|-----------|---------|---------------|--------------------|
| Valid   | ei kannaa G-alleelia | 4         | 2.3     | 2.4           | 2.4                |
|         | kantaa G-alleelia    | 162       | 94.2    | 97.6          | 100.0              |
|         | Total                | 166       | 96.5    | 100.0         |                    |
| Missing | System               | 6         | 3.5     |               |                    |
| Total   |                      | 172       | 100.0   |               |                    |

**inosnum**

|          | Frequency | Percent | Valid Percent | Cumulative Percent |
|----------|-----------|---------|---------------|--------------------|
| Valid G  | 107       | 62.2    | 62.2          | 62.2               |
| Both     | 55        | 32.0    | 32.0          | 94.2               |
| A        | 4         | 2.3     | 2.3           | 96.5               |
| Undeterm | 6         | 3.5     | 3.5           | 100.0              |
| Total    | 172       | 100.0   | 100.0         |                    |

**enos G-alleelin kantaja**

|                            | Frequency | Percent | Valid Percent | Cumulative Percent |
|----------------------------|-----------|---------|---------------|--------------------|
| Valid ei kannaa G-alleelia | 10        | 5.8     | 6.0           | 6.0                |
| kantaa G-alleelia          | 157       | 91.3    | 94.0          | 100.0              |
| Total                      | 167       | 97.1    | 100.0         |                    |
| Missing System             | 5         | 2.9     |               |                    |
| Total                      | 172       | 100.0   |               |                    |

**enos T-alleelin kantaja**

|                            | Frequency | Percent | Valid Percent | Cumulative Percent |
|----------------------------|-----------|---------|---------------|--------------------|
| Valid ei kannaa T-alleelia | 98        | 57.0    | 58.7          | 58.7               |
| kantaa T-alleelia          | 69        | 40.1    | 41.3          | 100.0              |
| Total                      | 167       | 97.1    | 100.0         |                    |
| Missing System             | 5         | 2.9     |               |                    |
| Total                      | 172       | 100.0   |               |                    |

**enosnum**

|          | Frequency | Percent | Valid Percent | Cumulative Percent |
|----------|-----------|---------|---------------|--------------------|
| Valid G  | 98        | 57.0    | 57.0          | 57.0               |
| Both     | 59        | 34.3    | 34.3          | 91.3               |
| T        | 10        | 5.8     | 5.8           | 97.1               |
| Undeterm | 5         | 2.9     | 2.9           | 100.0              |
| Total    | 172       | 100.0   | 100.0         |                    |

```
FREQUENCIES VARIABLES=carTestr carCestr estrogenum
/ORDER=ANALYSIS.
```

**Frequencies**

[DataSet1] G:\polymorfiat.sav

**Statistics**

|   |         | estr T-alleelin kantaja | estr C-alleelin kantaja | estrogeenireseptori numeerisesti |
|---|---------|-------------------------|-------------------------|----------------------------------|
| N | Valid   | 163                     | 163                     | 172                              |
|   | Missing | 9                       | 9                       | 0                                |

**Frequency Table**

**estr T-alleelin kantaja**

|         |                      | Frequency | Percent | Valid Percent | Cumulative Percent |
|---------|----------------------|-----------|---------|---------------|--------------------|
| Valid   | ei kannaa T-alleelia | 29        | 16.9    | 17.8          | 17.8               |
|         | kantaa T-alleelia    | 134       | 77.9    | 82.2          | 100.0              |
|         | Total                | 163       | 94.8    | 100.0         |                    |
| Missing | System               | 9         | 5.2     |               |                    |
| Total   |                      | 172       | 100.0   |               |                    |

**estr C-alleelin kantaja**

|         |                         | Frequency | Percent | Valid Percent | Cumulative Percent |
|---------|-------------------------|-----------|---------|---------------|--------------------|
| Valid   | ei ole alleelin kantaja | 52        | 30.2    | 31.9          | 31.9               |
|         | alleelin kantaja        | 111       | 64.5    | 68.1          | 100.0              |
|         | Total                   | 163       | 94.8    | 100.0         |                    |
| Missing | System                  | 9         | 5.2     |               |                    |
| Total   |                         | 172       | 100.0   |               |                    |

**estrogeenireseptori numeerisesti**

|       |         | Frequency | Percent | Valid Percent | Cumulative Percent |
|-------|---------|-----------|---------|---------------|--------------------|
| Valid | T       | 52        | 30.2    | 30.2          | 30.2               |
|       | Both    | 82        | 47.7    | 47.7          | 77.9               |
|       | C       | 29        | 16.9    | 16.9          | 94.8               |
|       | Undeter | 9         | 5.2     | 5.2           | 100.0              |
|       | Total   | 172       | 100.0   | 100.0         |                    |

\*\*\* carrrier A inos \*\*\*\*\*.

SORT CASES BY carAinos.

SPLIT FILE LAYERED BY carAinos.

FREQUENCIES VARIABLES=kreamax bleukmax painoero trombmin hkrmin hkrmax pil6  
max crpmax

/FORMAT=NOTABLE

/NTILES=4

/STATISTICS=STDDEV MINIMUM MAXIMUM MEAN MEDIAN

/ORDER=ANALYSIS.

## Frequencies

[DataSet1] G:\polymorfiat.sav

### Statistics

| inos A-alleelin kantaja |                |         | kreamax   | bleukmax | painoero | trombmin |         |
|-------------------------|----------------|---------|-----------|----------|----------|----------|---------|
| ei kanna A-alleelia     | N              | Valid   | 107       | 107      | 104      | 107      |         |
|                         |                | Missing | 0         | 0        | 3        | 0        |         |
|                         | Mean           |         | 306.9626  | 11.4327  | 3.0096   | 70.1495  |         |
|                         | Median         |         | 213.0000  | 10.3000  | 2.1500   | 65.0000  |         |
|                         | Std. Deviation |         | 273.17369 | 4.71829  | 2.60617  | 41.48398 |         |
|                         | Minimum        |         | 51.00     | 3.90     | .00      | 9.00     |         |
|                         | Maximum        |         | 1285.00   | 26.80    | 12.00    | 238.00   |         |
|                         | Percentiles    | 25      |           | 103.0000 | 8.1000   | .9000    | 41.0000 |
|                         |                | 50      |           | 213.0000 | 10.3000  | 2.1500   | 65.0000 |
| 75                      |                |         | 445.0000  | 13.5000  | 4.0750   | 90.0000  |         |
| kattaa A-alleelia       | N              | Valid   | 59        | 59       | 58       | 59       |         |
|                         |                | Missing | 0         | 0        | 1        | 0        |         |
|                         | Mean           |         | 261.8136  | 10.8814  | 2.7914   | 64.5254  |         |
|                         | Median         |         | 163.0000  | 8.9000   | 2.1000   | 57.0000  |         |
|                         | Std. Deviation |         | 260.90000 | 5.05796  | 2.69589  | 31.95274 |         |
|                         | Minimum        |         | 52.00     | 5.10     | .00      | 3.00     |         |
|                         | Maximum        |         | 1499.00   | 31.20    | 10.40    | 159.00   |         |
|                         | Percentiles    | 25      |           | 85.0000  | 7.5000   | .6750    | 43.0000 |
|                         |                | 50      |           | 163.0000 | 8.9000   | 2.1000   | 57.0000 |
| 75                      |                |         | 359.0000  | 12.6000  | 3.5500   | 81.0000  |         |

**Statistics**

| inos A-alleelin kantaja |             |                | hkrmin | hkrmax | pil6max  | crpmax   |
|-------------------------|-------------|----------------|--------|--------|----------|----------|
| ei kann A-alleelia      | N           | Valid          | 107    | 107    | 76       | 107      |
|                         |             | Missing        | 0      | 0      | 31       | 0        |
|                         |             | Mean           | .3587  | .4459  | 19.1736  | 84.2551  |
|                         |             | Median         | .3600  | .4400  | 13.5000  | 72.7000  |
|                         |             | Std. Deviation | .04028 | .05625 | 18.42707 | 51.68977 |
|                         |             | Minimum        | .25    | .33    | 1.31     | 11.00    |
|                         |             | Maximum        | .46    | .60    | 107.00   | 239.80   |
|                         | Percentiles | 25             | .3300  | .4000  | 8.2450   | 42.7000  |
|                         |             | 50             | .3600  | .4400  | 13.5000  | 72.7000  |
|                         |             | 75             | .3900  | .4800  | 23.4400  | 118.0000 |
| kattaa A-alleelia       | N           | Valid          | 59     | 59     | 37       | 59       |
|                         |             | Missing        | 0      | 0      | 22       | 0        |
|                         |             | Mean           | .3515  | .4322  | 20.1543  | 90.0237  |
|                         |             | Median         | .3500  | .4300  | 17.2000  | 79.0000  |
|                         |             | Std. Deviation | .04338 | .04724 | 12.26078 | 57.93077 |
|                         |             | Minimum        | .25    | .34    | 4.39     | 15.90    |
|                         |             | Maximum        | .44    | .59    | 44.81    | 269.20   |
|                         | Percentiles | 25             | .3200  | .4000  | 8.8400   | 35.7000  |
|                         |             | 50             | .3500  | .4300  | 17.2000  | 79.0000  |
|                         |             | 75             | .3900  | .4600  | 27.4800  | 120.0000 |

SPLIT FILE OFF.

NPAR TESTS

```
/M-W= kreamax bleukmax painoero trombmin hkrmin hkrmax pil6max crpmax BY
carAinos(0 1)
/MISSING ANALYSIS.
```

## NPar Tests

[DataSet1] G:\polymorfiat.sav

## Mann-Whitney Test

**Ranks**

|          | inos A-alleelin kantaja | N   | Mean Rank | Sum of Ranks |
|----------|-------------------------|-----|-----------|--------------|
| kreamax  | ei kannaa A-alleelia    | 107 | 88.07     | 9423.00      |
|          | kantaa A-alleelia       | 59  | 75.22     | 4438.00      |
|          | Total                   | 166 |           |              |
| bleukmax | ei kannaa A-alleelia    | 107 | 87.07     | 9316.50      |
|          | kantaa A-alleelia       | 59  | 77.03     | 4544.50      |
|          | Total                   | 166 |           |              |
| painoero | ei kannaa A-alleelia    | 104 | 83.81     | 8716.50      |
|          | kantaa A-alleelia       | 58  | 77.35     | 4486.50      |
|          | Total                   | 162 |           |              |
| trombmin | ei kannaa A-alleelia    | 107 | 85.16     | 9112.00      |
|          | kantaa A-alleelia       | 59  | 80.49     | 4749.00      |
|          | Total                   | 166 |           |              |
| hkrmin   | ei kannaa A-alleelia    | 107 | 85.56     | 9155.00      |
|          | kantaa A-alleelia       | 59  | 79.76     | 4706.00      |
|          | Total                   | 166 |           |              |
| hkrmax   | ei kannaa A-alleelia    | 107 | 87.83     | 9398.00      |
|          | kantaa A-alleelia       | 59  | 75.64     | 4463.00      |
|          | Total                   | 166 |           |              |
| pil6max  | ei kannaa A-alleelia    | 76  | 54.41     | 4135.50      |
|          | kantaa A-alleelia       | 37  | 62.31     | 2305.50      |
|          | Total                   | 113 |           |              |
| crpmax   | ei kannaa A-alleelia    | 107 | 82.29     | 8805.00      |
|          | kantaa A-alleelia       | 59  | 85.69     | 5056.00      |
|          | Total                   | 166 |           |              |

**Test Statistics<sup>a</sup>**

|                        | kreamax  | bleukmax | painoero | trombmin | hkrmin   | hkrmax   |
|------------------------|----------|----------|----------|----------|----------|----------|
| Mann-Whitney U         | 2668.000 | 2774.500 | 2775.500 | 2979.000 | 2936.000 | 2693.000 |
| Wilcoxon W             | 4438.000 | 4544.500 | 4486.500 | 4749.000 | 4706.000 | 4463.000 |
| Z                      | -1.648   | -1.289   | -.841    | -.599    | -.746    | -1.567   |
| Asymp. Sig. (2-tailed) | .099     | .197     | .401     | .549     | .456     | .117     |

**Test Statistics<sup>a</sup>**

|                        | pil6max  | crpmax   |
|------------------------|----------|----------|
| Mann-Whitney U         | 1209.500 | 3027.000 |
| Wilcoxon W             | 4135.500 | 8805.000 |
| Z                      | -1.202   | -.437    |
| Asymp. Sig. (2-tailed) | .229     | .662     |

a. Grouping Variable: inos A-alleelin kantaja

```

*** carrrier G inos *****.
SORT CASES BY carGinos.
SPLIT FILE LAYERED BY carGinos.

```

```

FREQUENCIES VARIABLES=kreamax bleukmax painoero trombmin hkrmin hkrmax pil6
max crpmax
  /FORMAT=NOTABLE
  /NTILES=4
  /STATISTICS=STDDEV MINIMUM MAXIMUM MEAN MEDIAN
  /ORDER=ANALYSIS.

```

## Frequencies

[DataSet1] G:\polymorfiat.sav

### Statistics

| inos G-alleelin kantaja |             |                | kreamax   | bleukmax | painoero | trombmin |
|-------------------------|-------------|----------------|-----------|----------|----------|----------|
| ei kann G alleelia      | N           | Valid          | 4         | 4        | 4        | 4        |
|                         |             | Missing        | 0         | 0        | 0        | 0        |
|                         |             | Mean           | 153.7500  | 9.8500   | 1.8250   | 44.7500  |
|                         |             | Median         | 83.0000   | 8.4000   | 1.8000   | 52.0000  |
|                         |             | Std. Deviation | 153.78855 | 5.36252  | 1.51959  | 32.50000 |
|                         |             | Minimum        | 65.00     | 5.10     | .00      | 3.00     |
|                         |             | Maximum        | 384.00    | 17.50    | 3.70     | 72.00    |
|                         | Percentiles | 25             | 68.2500   | 5.7500   | .4000    | 11.0000  |
|                         |             | 50             | 83.0000   | 8.4000   | 1.8000   | 52.0000  |
|                         |             | 75             | 310.0000  | 15.4000  | 3.2750   | 71.2500  |
| kattaa G-alleelia       | N           | Valid          | 162       | 162      | 158      | 162      |
|                         |             | Missing        | 0         | 0        | 4        | 0        |
|                         |             | Mean           | 294.3025  | 11.2710  | 2.9595   | 68.7284  |
|                         |             | Median         | 193.5000  | 10.0000  | 2.2000   | 62.0000  |
|                         |             | Std. Deviation | 270.58224 | 4.83325  | 2.65138  | 38.40161 |
|                         |             | Minimum        | 51.00     | 3.90     | .00      | 9.00     |
|                         |             | Maximum        | 1499.00   | 31.20    | 12.00    | 238.00   |
|                         | Percentiles | 25             | 98.7500   | 7.6750   | .9000    | 42.0000  |
|                         |             | 50             | 193.5000  | 10.0000  | 2.2000   | 62.0000  |
|                         |             | 75             | 381.5000  | 13.1000  | 3.9250   | 88.0000  |

**Statistics**

| inos G-alleelin kantaja |             |                | hkrmin | hkrmax | pil6max  | crpmax   |
|-------------------------|-------------|----------------|--------|--------|----------|----------|
| ei kann G alleelia      | N           | Valid          | 4      | 4      | 2        | 4        |
|                         |             | Missing        | 0      | 0      | 2        | 0        |
|                         |             | Mean           | .3850  | .4600  | 11.4150  | 42.9750  |
|                         |             | Median         | .3900  | .4500  | 11.4150  | 43.5000  |
|                         |             | Std. Deviation | .02646 | .05033 | 4.27800  | 24.07341 |
|                         |             | Minimum        | .35    | .41    | 8.39     | 15.90    |
|                         |             | Maximum        | .41    | .53    | 14.44    | 69.00    |
|                         | Percentiles | 25             | .3575  | .4200  | 8.3900   | 19.6000  |
|                         |             | 50             | .3900  | .4500  | 11.4150  | 43.5000  |
|                         |             | 75             | .4075  | .5100  | .        | 65.8250  |
| kattaa G-alleelia       | N           | Valid          | 162    | 162    | 111      | 162      |
|                         |             | Missing        | 0      | 0      | 51       | 0        |
|                         |             | Mean           | .3554  | .4406  | 19.6403  | 87.3753  |
|                         |             | Median         | .3600  | .4400  | 14.6000  | 78.9500  |
|                         |             | Std. Deviation | .04153 | .05362 | 16.71996 | 54.01242 |
|                         |             | Minimum        | .25    | .33    | 1.31     | 11.00    |
|                         |             | Maximum        | .46    | .60    | 107.00   | 269.20   |
|                         | Percentiles | 25             | .3300  | .4000  | 8.7700   | 42.5500  |
|                         |             | 50             | .3600  | .4400  | 14.6000  | 78.9500  |
|                         |             | 75             | .3900  | .4700  | 25.4000  | 120.0000 |

SPLIT FILE OFF.

NPAR TESTS

/M-W= kreamax bleukmax painoero trombmin hkrmin hkrmax pil6max crpmax BY  
carGinos(0 1)

/MISSING ANALYSIS.

## NPar Tests

[DataSet1] G:\polymorfiat.sav

## Mann-Whitney Test



**Ranks**

| inos G-alleelin kantaja |                     | N   | Mean Rank | Sum of Ranks |
|-------------------------|---------------------|-----|-----------|--------------|
| kreamax                 | ei kanna G alleelia | 4   | 44.25     | 177.00       |
|                         | kantaa G-alleelia   | 162 | 84.47     | 13684.00     |
|                         | Total               | 166 |           |              |
| bleukmax                | ei kanna G alleelia | 4   | 65.63     | 262.50       |
|                         | kantaa G-alleelia   | 162 | 83.94     | 13598.50     |
|                         | Total               | 166 |           |              |
| painoero                | ei kanna G alleelia | 4   | 63.88     | 255.50       |
|                         | kantaa G-alleelia   | 158 | 81.95     | 12947.50     |
|                         | Total               | 162 |           |              |
| trombmin                | ei kanna G alleelia | 4   | 57.25     | 229.00       |
|                         | kantaa G-alleelia   | 162 | 84.15     | 13632.00     |
|                         | Total               | 166 |           |              |
| hkrmin                  | ei kanna G alleelia | 4   | 121.00    | 484.00       |
|                         | kantaa G-alleelia   | 162 | 82.57     | 13377.00     |
|                         | Total               | 166 |           |              |
| hkrmax                  | ei kanna G alleelia | 4   | 101.63    | 406.50       |
|                         | kantaa G-alleelia   | 162 | 83.05     | 13454.50     |
|                         | Total               | 166 |           |              |
| pil6max                 | ei kanna G alleelia | 2   | 42.00     | 84.00        |
|                         | kantaa G-alleelia   | 111 | 57.27     | 6357.00      |
|                         | Total               | 113 |           |              |
| crpmax                  | ei kanna G alleelia | 4   | 39.25     | 157.00       |
|                         | kantaa G-alleelia   | 162 | 84.59     | 13704.00     |
|                         | Total               | 166 |           |              |

**Test Statistics<sup>b</sup>**

|                                | kreamax | bleukmax | painoero | trombmin | hkrmin    | hkrmax    |
|--------------------------------|---------|----------|----------|----------|-----------|-----------|
| Mann-Whitney U                 | 167.000 | 252.500  | 245.500  | 219.000  | 174.000   | 251.500   |
| Wilcoxon W                     | 177.000 | 262.500  | 255.500  | 229.000  | 13377.000 | 13454.500 |
| Z                              | -1.653  | -.753    | -.761    | -1.106   | -1.584    | -.765     |
| Asymp. Sig. (2-tailed)         | .098    | .451     | .447     | .269     | .113      | .444      |
| Exact Sig. [2*(1-tailed Sig.)] |         |          |          |          |           |           |

### Test Statistics<sup>b</sup>

|                                | pil6max           | crpmax  |
|--------------------------------|-------------------|---------|
| Mann-Whitney U                 | 81.000            | 147.000 |
| Wilcoxon W                     | 84.000            | 157.000 |
| Z                              | -.653             | -1.864  |
| Asymp. Sig. (2-tailed)         | .514              | .062    |
| Exact Sig. [2*(1-tailed Sig.)] | .544 <sup>a</sup> |         |

a. Not corrected for ties.

b. Grouping Variable: inos G-alleelin kantaja

```
*** inos *****.
```

```
SORT CASES BY inosnum.
```

```
SPLIT FILE LAYERED BY inosnum.
```

```
FREQUENCIES VARIABLES=kreamax bleukmax painoero trombmin hkrmin hkrmax pil6  
max crpmax
```

```
  /FORMAT=NOTABLE
```

```
  /NTILES=4
```

```
  /STATISTICS=STDDEV MINIMUM MAXIMUM MEAN MEDIAN
```

```
  /ORDER=ANALYSIS.
```

## Frequencies

```
[DataSet1] G:\polymorfiat.sav
```

**Statistics**

| inosnum  |   |                | creamax   | bleukmax | painoero | trombmin |         |
|----------|---|----------------|-----------|----------|----------|----------|---------|
| G        | N | Valid          | 107       | 107      | 104      | 107      |         |
|          |   | Missing        | 0         | 0        | 3        | 0        |         |
|          |   | Mean           | 306.9626  | 11.4327  | 3.0096   | 70.1495  |         |
|          |   | Median         | 213.0000  | 10.3000  | 2.1500   | 65.0000  |         |
|          |   | Std. Deviation | 273.17369 | 4.71829  | 2.60617  | 41.48398 |         |
|          |   | Minimum        | 51.00     | 3.90     | .00      | 9.00     |         |
|          |   | Maximum        | 1285.00   | 26.80    | 12.00    | 238.00   |         |
|          |   | Percentiles    | 25        | 103.0000 | 8.1000   | .9000    | 41.0000 |
|          |   |                | 50        | 213.0000 | 10.3000  | 2.1500   | 65.0000 |
|          |   |                | 75        | 445.0000 | 13.5000  | 4.0750   | 90.0000 |
| Both     | N | Valid          | 55        | 55       | 54       | 55       |         |
|          |   | Missing        | 0         | 0        | 1        | 0        |         |
|          |   | Mean           | 269.6727  | 10.9564  | 2.8630   | 65.9636  |         |
|          |   | Median         | 166.0000  | 8.9000   | 2.2000   | 57.0000  |         |
|          |   | Std. Deviation | 266.21246 | 5.07896  | 2.75861  | 31.73091 |         |
|          |   | Minimum        | 52.00     | 5.60     | .00      | 17.00    |         |
|          |   | Maximum        | 1499.00   | 31.20    | 10.40    | 159.00   |         |
|          |   | Percentiles    | 25        | 88.0000  | 7.5000   | .6750    | 45.0000 |
|          |   |                | 50        | 166.0000 | 8.9000   | 2.2000   | 57.0000 |
|          |   |                | 75        | 359.0000 | 12.6000  | 3.5750   | 83.0000 |
| A        | N | Valid          | 4         | 4        | 4        | 4        |         |
|          |   | Missing        | 0         | 0        | 0        | 0        |         |
|          |   | Mean           | 153.7500  | 9.8500   | 1.8250   | 44.7500  |         |
|          |   | Median         | 83.0000   | 8.4000   | 1.8000   | 52.0000  |         |
|          |   | Std. Deviation | 153.78855 | 5.36252  | 1.51959  | 32.50000 |         |
|          |   | Minimum        | 65.00     | 5.10     | .00      | 3.00     |         |
|          |   | Maximum        | 384.00    | 17.50    | 3.70     | 72.00    |         |
|          |   | Percentiles    | 25        | 68.2500  | 5.7500   | .4000    | 11.0000 |
|          |   |                | 50        | 83.0000  | 8.4000   | 1.8000   | 52.0000 |
|          |   |                | 75        | 310.0000 | 15.4000  | 3.2750   | 71.2500 |
| Undeterm | N | Valid          | 6         | 6        | 6        | 6        |         |
|          |   | Missing        | 0         | 0        | 0        | 0        |         |
|          |   | Mean           | 207.8333  | 13.1000  | 1.8167   | 60.5000  |         |
|          |   | Median         | 201.5000  | 13.1500  | 1.7000   | 58.5000  |         |
|          |   | Std. Deviation | 123.92484 | 3.74273  | 1.44418  | 28.95341 |         |
|          |   | Minimum        | 70.00     | 8.20     | .20      | 15.00    |         |
|          |   | Maximum        | 401.00    | 18.20    | 3.70     | 93.00    |         |

**Statistics**

| inosnum  |   |                | hkrmin | hkrmx  | pil6max  | crpmax   |          |
|----------|---|----------------|--------|--------|----------|----------|----------|
| G        | N | Valid          | 107    | 107    | 76       | 107      |          |
|          |   | Missing        | 0      | 0      | 31       | 0        |          |
|          |   | Mean           | .3587  | .4459  | 19.1736  | 84.2551  |          |
|          |   | Median         | .3600  | .4400  | 13.5000  | 72.7000  |          |
|          |   | Std. Deviation | .04028 | .05625 | 18.42707 | 51.68977 |          |
|          |   | Minimum        | .25    | .33    | 1.31     | 11.00    |          |
|          |   | Maximum        | .46    | .60    | 107.00   | 239.80   |          |
|          |   | Percentiles    | 25     | .3300  | .4000    | 8.2450   | 42.7000  |
|          |   |                | 50     | .3600  | .4400    | 13.5000  | 72.7000  |
|          |   |                | 75     | .3900  | .4800    | 23.4400  | 118.0000 |
| Both     | N | Valid          | 55     | 55     | 35       | 55       |          |
|          |   | Missing        | 0      | 0      | 20       | 0        |          |
|          |   | Mean           | .3491  | .4302  | 20.6537  | 93.4455  |          |
|          |   | Median         | .3500  | .4300  | 21.6000  | 85.9000  |          |
|          |   | Std. Deviation | .04352 | .04684 | 12.40491 | 58.27928 |          |
|          |   | Minimum        | .25    | .34    | 4.39     | 16.30    |          |
|          |   | Maximum        | .44    | .59    | 44.81    | 269.20   |          |
|          |   | Percentiles    | 25     | .3200  | .3900    | 8.9100   | 41.4000  |
|          |   |                | 50     | .3500  | .4300    | 21.6000  | 85.9000  |
|          |   |                | 75     | .3900  | .4600    | 27.5600  | 127.0000 |
| A        | N | Valid          | 4      | 4      | 2        | 4        |          |
|          |   | Missing        | 0      | 0      | 2        | 0        |          |
|          |   | Mean           | .3850  | .4600  | 11.4150  | 42.9750  |          |
|          |   | Median         | .3900  | .4500  | 11.4150  | 43.5000  |          |
|          |   | Std. Deviation | .02646 | .05033 | 4.27800  | 24.07341 |          |
|          |   | Minimum        | .35    | .41    | 8.39     | 15.90    |          |
|          |   | Maximum        | .41    | .53    | 14.44    | 69.00    |          |
|          |   | Percentiles    | 25     | .3575  | .4200    | 8.3900   | 19.6000  |
|          |   |                | 50     | .3900  | .4500    | 11.4150  | 43.5000  |
|          |   |                | 75     | .4075  | .5100    | .        | 65.8250  |
| Undeterm | N | Valid          | 6      | 6      | 5        | 6        |          |
|          |   | Missing        | 0      | 0      | 1        | 0        |          |
|          |   | Mean           | .3600  | .4383  | 15.0280  | 61.5667  |          |
|          |   | Median         | .3600  | .4500  | 14.2000  | 51.5000  |          |
|          |   | Std. Deviation | .01673 | .05811 | 5.29451  | 43.20063 |          |
|          |   | Minimum        | .33    | .35    | 8.89     | 20.00    |          |
|          |   | Maximum        | .38    | .50    | 22.97    | 118.80   |          |

### Statistics

| inosnum  |             |    | kreamax  | bleukmax | painoero | trombmin |
|----------|-------------|----|----------|----------|----------|----------|
| Undeterm | Percentiles | 25 | 97.7500  | 9.4000   | .3500    | 40.5000  |
|          |             | 50 | 201.5000 | 13.1500  | 1.7000   | 58.5000  |
|          |             | 75 | 299.7500 | 16.6250  | 3.3250   | 90.0000  |

### Statistics

| inosnum  |             |    | hkrmin | hkrmax | pil6max | crpmax   |
|----------|-------------|----|--------|--------|---------|----------|
| Undeterm | Percentiles | 25 | .3525  | .3800  | 10.5850 | 23.7500  |
|          |             | 50 | .3600  | .4500  | 14.2000 | 51.5000  |
|          |             | 75 | .3725  | .4925  | 19.8850 | 106.6500 |

NPAR TESTS

```
/K-W=kreamax bleukmax painoero trombmin hkrmin hkrmax pil6max crpmax BY i  
nosnum(1 3)
```

```
/MISSING ANALYSIS.
```

## NPar Tests

[DataSet1] G:\polymorfiat.sav

## Kruskal-Wallis Test

**Ranks**

|          | inosnum | N   | Mean Rank |
|----------|---------|-----|-----------|
| kreamax  | G       | 107 | 88.07     |
|          | Both    | 55  | 77.47     |
|          | A       | 4   | 44.25     |
|          | Total   | 166 |           |
| bleukmax | G       | 107 | 87.07     |
|          | Both    | 55  | 77.85     |
|          | A       | 4   | 65.63     |
|          | Total   | 166 |           |
| painoero | G       | 104 | 83.81     |
|          | Both    | 54  | 78.35     |
|          | A       | 4   | 63.88     |
|          | Total   | 162 |           |
| trombmin | G       | 107 | 85.16     |
|          | Both    | 55  | 82.18     |
|          | A       | 4   | 57.25     |
|          | Total   | 166 |           |
| hkrmin   | G       | 107 | 85.56     |
|          | Both    | 55  | 76.76     |
|          | A       | 4   | 121.00    |
|          | Total   | 166 |           |
| hkrmax   | G       | 107 | 87.83     |
|          | Both    | 55  | 73.75     |
|          | A       | 4   | 101.63    |
|          | Total   | 166 |           |
| pil6max  | G       | 76  | 54.41     |
|          | Both    | 35  | 63.47     |
|          | A       | 2   | 42.00     |
|          | Total   | 113 |           |
| crpmax   | G       | 107 | 82.29     |
|          | Both    | 55  | 89.07     |
|          | A       | 4   | 39.25     |
|          | Total   | 166 |           |

**Test Statistics<sup>a,b</sup>**

|             | kreamax | bleukmax | painoero | trombmin | hkrmin | hkrmax |
|-------------|---------|----------|----------|----------|--------|--------|
| Chi-Square  | 4.498   | 1.903    | 1.061    | 1.362    | 3.733  | 3.713  |
| df          | 2       | 2        | 2        | 2        | 2      | 2      |
| Asymp. Sig. | .106    | .386     | .588     | .506     | .155   | .156   |

**Test Statistics<sup>a,b</sup>**

|             | pil6max | crpmax |
|-------------|---------|--------|
| Chi-Square  | 2.258   | 4.198  |
| df          | 2       | 2      |
| Asymp. Sig. | .323    | .123   |

- a. Kruskal Wallis Test
- b. Grouping Variable: inosnum
